# 1 **Developmental changes of opsin gene expression in ray-finned fishes** 2 **(Actinopterygii)**

3

4 Nik Lupše<sup>1\*</sup>, Monika Kłodawska<sup>1</sup>, Veronika Truhlářová<sup>1</sup>, Prokop Košátko<sup>1</sup>, Vojtěch Kašpar<sup>2</sup>,  
5 Arnold Roger Bitja Nyom<sup>3,4</sup>, Zuzana Musilova<sup>1\*</sup>

6

7 <sup>1</sup>Department of Zoology, Faculty of Science, Charles University, Vinicna 7, 12844 Prague,  
8 Czech Republic

9 <sup>2</sup>University of South Bohemia in České Budějovice, Faculty of Fisheries and Protection of  
10 Waters, South Bohemian Research Center of Aquaculture and Biodiversity of Hydrocenoses,  
11 Research Institute of Fish Culture and Hydrobiology, Zátíší 728/II, 389 25 Vodňany, Czech  
12 Republic

13 <sup>3</sup>Department of Management of Fisheries and Aquatic Ecosystems, University of Douala,  
14 Douala, Cameroon

15 <sup>4</sup>Department of Biological Sciences, University of Ngaoundéré, Ngaoundéré, Cameroon

16

17 \* Corresponding authors; [lupsen@natur.cuni.cz](mailto:lupsen@natur.cuni.cz), [zuzana.musilova@natur.cuni.cz](mailto:zuzana.musilova@natur.cuni.cz)

18

19 **Keywords:** opsin, evolution, Actinopterygii, development, vision, gene expression

20

## 21 **Abstract**

22 Fish often change their habitat and trophic preferences during development. Dramatic  
23 functional differences between embryos, larvae, juveniles and adults also concern sensory  
24 systems, including vision. Here we focus on the photoreceptors (rod and cone cells) in the  
25 retina and their gene expression profiles during the development. Using comparative  
26 transcriptomics on 63 species, belonging to 23 actinopterygian orders, we report general  
27 developmental patterns of opsin expression, mostly suggesting an increased importance of the  
28 rod opsin (*RH1*) gene and the long-wavelength sensitive (*LWS*) cone opsin, and a decreasing  
29 importance of the shorter wavelength sensitive cone opsin throughout development.  
30 Furthermore, we investigate in detail ontogenetic changes in 14 selected species (from  
31 Polypteriformes, Acipenseriformes, Cypriniformes, Aulopiformes and Cichliformes), and we  
32 report examples of expanded cone opsin repertoires, cone opsin switches (mostly within *RH2*)  
33 and increasing rod:cone ratio as evidenced by the opsin and phototransduction cascade genes.

34 Our findings provide molecular support for developmental stage-specific visual palettes of ray-  
35 finned fishes and shifts between, which most likely arose in response to ecological, behavioural  
36 and physiological factors.

37

## 38 INTRODUCTION

39 Fish visual systems are very diverse, and they vary in morphology, physiology and spectral  
40 sensitivity (Hunt et al. 2014, Carleton et al. 2020, Musilova et al. 2021). Vertebrate vision is  
41 enabled by cone and rod photoreceptors in the retina, which carry light-sensitive molecules  
42 composed of an opsin protein bound to a light absorbing, vitamin A-derived chromophore  
43 (Lamb 2013). In fishes, there are usually four types of cone opsins [*SWS1* and *SWS2*;  
44 commonly found in single cones, whereas *RH2* and *LWS* in double cones; with the respective  
45 peak sensitivity ranges of 347 – 383 nm, 397 – 482 nm, 452 – 537 nm and 501 – 573 nm;  
46 (Carleton et al. 2020)] used for photopic and colour vision, and one rod opsin (rhodopsin, *RH1*  
47 or Rho) for scotopic vision in dim-light conditions (Carleton et al. 2020). Through gene  
48 duplications followed by functional diversifications, extant teleost fishes reached a median of  
49 seven cone opsin genes within their genomes (Musilova et al. 2019a). Throughout the  
50 phylogeny, teleost genomes contain more copies of double-cone genes (middle and longer-  
51 wavelength sensitive; *RH2* and *LWS*) than that of single-cones (shorter-wavelength *SWS1* and  
52 *SWS2*). While the *SWS1* is often missing from the genome or seen in one, at best two copies  
53 (Musilova et al, 2021) and *SWS2* seen in up to three copies (Cortesi et al., 2015), teleost  
54 genomes can contain up to eight copies of *RH2* (Musilova & Cortesi, 2021) and up to five  
55 copies of *LWS* (Cortesi et al., 2021). Unlike cone opsins, rod opsin duplicates are rarely found,  
56 most often in mesopelagic lineages (Pointer et al. 2007, Musilova et al. 2019a, Lupše et al.  
57 2021). Higher copy number is considered beneficial by providing more “substrate” for  
58 selection, as well as for alternative gene expression of the variants within the opsin type.

59 The formation of the eye, and expression of opsin genes, starts already at the embryonic  
60 stage (Hagedorn and Fernald 1992, Carleton et al. 2008). Still, eyes continue to grow, and new  
61 photoreceptors are being added throughout life (Fernald 1985). Within the retina, cone  
62 photoreceptors are first to develop, followed by temporally and spatially distinct rods  
63 (Raymond 1995, Helvik et al. 2001, Shen & Raymond 2004). For example, in zebrafish,  
64 photoreceptor progenitor cells start out by first differentiating into cones before rods are added  
65 later during development (Sernagor et al. 2006), suggesting that vision changes with age. This  
66 cone-to-rod developmental sequence is likely shared across vertebrates (Atlantic cod: Valen et  
67 al. 2016; zebrafish: Sernagor et al. 2006; mice: Mears et al. 2001; rhesus monkey: La Vail et

68 al. 1991) and appears to hold even for teleost species with an all-rod retina in the adult stage  
69 (Lupše et al. 2021).

70         Photic conditions can change spatially and temporally, resulting in a visually  
71 heterogeneous environment in which visual systems of fishes are expected to be under natural  
72 selection that favours those that match the local environment (Carleton et al. 2016). For  
73 example, longer and shorter wavelengths are scattered and filtered out with increasing water  
74 depth and consequently, fishes living in deep-water habitats such as sculpins of Lake Baikal  
75 (Hunt 1997), cichlids of lakes Malawi and Tanganyika (Sugawara et al. 2005; Ricci et al. 2022),  
76 and African crater lakes (Malinsky et al. 2015; Musilova et al. 2019b), as well as deep-sea  
77 fishes (Douglas et al. 2003, Lupše et al. 2021) have visual systems sensitive to the blue-green  
78 part of the visible spectrum. Adaptation can be achieved either through functional  
79 diversifications of opsin genes when mutations at key-spectral tuning sites shift the peak  
80 spectral sensitivity ( $\lambda_{\max}$ ) of the photopigment (Yokoyama 2008, 2020), or by regulation of the  
81 opsin gene expression. This can be achieved when a subset of opsin genes is expressed and  
82 altered among or within species and even within the same individuals during ontogeny  
83 (Carleton & Kocher 2001, Manousaki et al. 2013, Carleton 2016, Lupše et al. 2021).

84         Before reaching the juvenile or sexually mature adult stage, fish larvae undergo major  
85 anatomical, physiological, behavioural and quite often, ecological changes (Evans & Browman  
86 2004, Carleton et al. 2020). Developmental shift in habitat preference is often suggested to  
87 drive ontogenetic changes in opsin expression (e.g. cichlids: Carleton et al. 2016, Härer et al.  
88 2017; black bream: Shand et al., 2002; eel: Cottrill et al. 2009; squirrelfishes and soldierfishes:  
89 Fogg et al. 2021; clown anemonefish: Roux et al. 2022; damselfishes: Stieb et al. 2016, bluefin  
90 killifish: Chang et al. 2021; gambusia: Chang et al. 2020; rainbow trout: Allison et al. 2006;  
91 dottybacks: Cortesi et al. 2016; starry flounder (Savelli et al. 2018); deep-sea fishes: de  
92 Busserolles et al. 2014, Lupše et al. 2021). However, habitat-related changes of photic  
93 conditions solely do not always result in different and stage-specific visual system  
94 modifications, as seen in the Atlantic cod (Valen et al. 2016) or the spotted unicornfish  
95 (Tettamanti et al. 2019). Shifts in diet (planktivory, carnivory, herbivory) and activity patterns  
96 (diurnal, nocturnal, crepuscular) (King and McFarlane 2003; Helfman et al. 2009, Fogg et al.  
97 2021), in addition to developmental or phylogenetic constraints seem to also play a role in  
98 shaping the visual diversity of fishes and potential age-related shifts of it.

99         Here we aim to investigate ontogenetic changes of the opsin and phototransduction  
100 cascade gene expression across ray-finned fishes, to estimate presence and relative abundance  
101 of opsin gene classes, and to elucidate general and/or taxon-specific patterns. For the purpose

102 of this study we have sequenced and analysed 1) retinal transcriptomes of different  
103 developmental stages of 14 species, belonging to five major actinopterygian orders: *Polypterus*  
104 *senegalensis* (Polypteriformes), *Acipenser ruthenus* (Acipenseriformes), *Abramis brama* and  
105 *Vimba vimba* (both Cypriniformes), *Scopelarchus* spp. and *Coccorella atlantica* (both  
106 Aulopiformes), *Coptodon bembini*, *C. imbriferus*, *C. flava*, *C. snyderae*, *C. thysi*, *Sarotherodon*  
107 *linnelli*, *S. lohbergeri* and *Stomatepia pindu* (all Cichliformes from the Bermin and Barombi  
108 Mbo lakes). 2) We have complemented this data set by publicly available  
109 embryonic/larval/juvenile/adult transcriptomes belonging to 49 species and 21 orders, some of  
110 which have never been analysed for visual gene expression before. In total, the comprehensive  
111 data set of 63 species from 23 ray-finned fish orders allows us to focus on development of the  
112 opsin gene expression, and rod and cone cell identity throughout actinopterygian evolution.

113

## 114 **METHODS AND MATERIALS**

115 **Data and sample collection** Transcriptomes belonging to taxa deemed as focal groups, which  
116 were inspected for age-specific copies and presented in detail in Figure 3, were obtained from  
117 specimens (N=73) caught solely for the purpose of this study. In detail, 16 specimens were  
118 classified as larvae, 4 as juveniles, 3 as subadults and 50 as adults (Figure 3, Supp Table).  
119 *Polypterus senegalensis* larvae were collected in the rearing facility of the Department of  
120 Zoology, Charles University, and the adults were purchased from the aquarium trade.  
121 *Acipenser ruthenus* and *Abramis brama* were collected at the rearing facility in Vodňany, and  
122 in local water bodies (adults: Velký Tisý pond, Klicava dam, Lipno dam; larvae: Vltava and  
123 Elbe rivers), Czech Republic, respectively. Both mesopelagic taxa, *Scopelarchus* spp. and  
124 *Coccorella atlantica*, were collected in the Sargasso Sea and originate from Lupše et al. (2021).  
125 Crater lake cichlids were collected in lakes Barombi Mbo and Bermin (Cameroon, West  
126 Africa) between 2013 and 2018 (research permit numbers:  
127 0000047,49/MINRESI/B00/C00/C10/nye, 0000116,117/MINRESI/ B00/C00/C10/C14,  
128 000002-3/MINRESI/B00/C00/C10/C11, 0000032,48-50/MINRESI/B00/C00/C10/C12).  
129 Larvae were caught by fine-meshed nets and fixed in RNAlater™ immediately. Adults were  
130 collected using gill nets and selective capturing by snorkelling in the shallow-water zone. For  
131 all species, fin clips were taken from specimens and stored in 96% EtOH for sub-sequent  
132 molecular analyses. Larval samples were fixed in RNAlater™ (ThermoFisher) and stored at  
133 -80 °C until further use. Adults of all species were euthanised on site with eyes or retinae  
134 extracted, fixed in RNAlater™ and stored at -80 °C upon arrival to the laboratory.

135 To obtain publicly available transcriptomes used in this study (Fig 1, Supp Table), we  
136 searched the largest publicly available repository of high throughput sequencing data, the  
137 Sequence Read Archive (SRA), using the following topic search term: ‘(*embryo\* OR larva\**  
138 *OR juvenile\* OR adult\**) AND (*retina\* OR eye\* OR head\* OR whole\**) AND (*taxon name \**  
139 *OR fish\**)’. Whenever possible, we have analysed up to three specimens per stage per species  
140 (Fig 1, Supp Table). In case of embryos, specimens closest to hatching were analysed. The  
141 entire dataset analysed, including de-novo transcriptomes described below, includes 215  
142 samples of which, based on morphology, 56 were classified as embryos, 40 as larvae, 25 as  
143 juveniles, 3 as subadults and 91 as adults (Figs 1 and 3, Supp Table). Sample IDs, number of  
144 raw reads, individual accession numbers for BioProject PRJNA841439 and further parameters  
145 are listed in the Supplementary Table.

146

147 **Transcriptome sequencing and analyses** Total RNA was extracted from the whole eyes or  
148 retinal tissue using either the RNeasy micro or mini kit (Qiagen). The extracted RNA  
149 concentration and integrity were verified on a 2100 Bioanalyzer (Agilent) and Qubit  
150 Fluorometer (ThermoFisher Scientific). RNAseq libraries were constructed in-house from  
151 unfragmented total RNA using Illumina’s NEBNext Ultra II Directional RNA library  
152 preparation kit, NEBNext Multiplex Oligos and the NEBNext Poly(A) mRNA Magnetic  
153 Isolation Module (New England Biolabs). Multiplexed libraries were sequenced on the  
154 Illumina HiSeq 2500 platform as 150 bp paired-end (PE) reads. The sequence data was quality-  
155 checked using FastQC (Andrews 2017). Opsin gene expression was then quantified using  
156 Geneious software version 11.0.3 (Kearse et al. 2012). In case of each sample, we mapped the  
157 reads against a general genomic reference dataset for all visual opsin genes composed of Nile  
158 tilapia, zebrafish and the longnose gar, using the Medium-sensitivity settings in Geneious. This  
159 enabled us to capture most of the cone and rod opsin specific reads and create species-specific  
160 opsin references. If needed, paralogous genes were subsequently disentangled following the  
161 methods in Musilova et al. (2019a) and de Busserolles et al. (2017). Transcriptome reads were  
162 then re-mapped to the newly created (species-specific) references with Medium-Low  
163 sensitivity to obtain copy-specific expression levels. We report opsin gene proportional  
164 expression in relation to the total opsin gene expression which was calculated using FPKM  
165 (Fragments Per Kilobase of transcript Per Million reads), taking into account the library size,  
166 the length of each gene and number of mapped reads (Supp Table). The abovementioned  
167 quantification of opsin gene expression was also used on transcriptomes obtained from SRA.  
168 Identical pipeline was used for quantification of *GNAT1/2* genes in selected taxa (Fig 3).

169 **Statistical analyses** To formally test whether opsin gene expression differs between  
170 developmental stages, we applied the beta regression models specifically designed to analyse  
171 the proportional data sets and percentages. We used the R package betareg (Cribari-Neto &  
172 Zeileis 2010), which allows handling of non-transformed data. The beta distribution has a  
173 highly flexible shape and is, hence, suitable to fit the dependent variable (in our case the  
174 proportional expression of each opsin gene) in the standard unit interval (0,1) with a mean  
175 related to a set of categorical regressors (in our case developmental stage). We tested the  
176 difference for each cone opsin gene class separately (i.e, *SWS1*, *SWS2*, *RH2* and *LWS*), then for  
177 the sum of single cone- (*SWS1+SWS2*), and double cone opsins (*RH2+LWS*), and additionally  
178 also for rods (*RH1*) and cones (*SWS1+SWS2+RH2+LWS*).

179

## 180 **RESULTS AND DISCUSSION**

181 **General developmental patterns of opsin gene expression across the actinopterygian**  
182 **phylogeny – cone-to-rod developmental constraint.** The analysis of the opsin gene  
183 expression in 63 ray-finned fishes revealed that, generally, the ratio of the rod opsin (*RH1* or  
184 Rho,  $\lambda_{\max}$ : 447–525 nm) to cone opsin expression increases with age in analysed species (Figs  
185 1 and 2, Table 1, Supp Table;  $p = <0.001$ ). This is in accord with the cone-to-rod development  
186 of the retina which starts with cone cells, and rods appearing only later (Sernagor et al. 2006,  
187 Valen et al. 2016, Lupše et al. 2021). The increasing rod:cone cell ratio is further confirmed by  
188 the expression of the phototransduction cascade gene *GNAT1* (rod specific) vs. *GNAT2* (cone  
189 specific), Fig. 3b. Rod opsin and *GNAT1/2* usage increases significantly already during the  
190 larval and juvenile stage, before finally transforming into sexually mature adults with rod-  
191 dominant retina (Figs 1 and 2, Supp Table). It thus seems that larval vision is mostly driven by  
192 cone vision, while the ability to perform well in low-light conditions appears consequently, at  
193 later developmental stages (Evans and Browman 2004, Evans and Fernald 1990). Functionally,  
194 rods generally allow for an improvement in visual acuity and startle responses in fishes  
195 (Fuiman 1993, Pankhurst et al. 1993, Fuiman and Delbos 1998) and are also associated with  
196 motion sensitivity and the appearance of novel behaviours, such as schooling (Hunter & Coyne  
197 1982). More specifically, higher rod expression increases individual performance of fishes  
198 living in the deep-sea (de Busserolles et al. 2020, Lupše et al. 2021). Additionally, laboratory  
199 experiments have shown that the ability to follow a rotating stripe pattern (the optomotor drum)  
200 might be dependent on rod formation and retinal development, as it is not seen in stages or  
201 specimens lacking rods (Blaxter 1986, Carvalho et al. 2002, Magnuson et al. 2020).

202 In the selected taxa (Fig. 3), we have specifically focused on the rod vs. cone identity  
203 by quantifying the expression of the phototransduction cascade gene *GNAT1* or *GNAT2*,  
204 respectively. We found correspondence between the expression of phototransduction cascade  
205 gene type and the opsin type (i.e. cone *SWS1*, *SWS2*, *RH2*, *LWS* and rod *RH1*), and detected a  
206 clear increase of *GNAT1:GNAT2* ratio with ageing, with the exception of the Aulopiformes  
207 deep-sea fishes. In this group, a discordance between the dominating opsin type (rod-specific)  
208 and phototransduction cascade genes (cone-specific) in adults challenges the rod vs. cone  
209 identity and suggests a presence of possibly partially transmuted photoreceptors, potentially  
210 similar but not identical to other vertebrates (snakes and geckoes: Simoes et al. 2016; Schott et  
211 al. 2019; deep-sea fishes: de Busserolles et al. 2017, Wagner et al. 2019, Lupše et al. 2021;  
212 salamanders: Mariani 1986). The overall intriguing visual system of aulopiforms, hence,  
213 definitely needs to be investigated further and in more detail (Fig 3, Lupše et al. 2021).

214

215 **Developmental switch of the short-wavelength sensitive opsin genes.** A trend of age-related  
216 shifts in expression also appears within cone opsins (Table 1). Our data set shows a clear  
217 decrease in proportional expression of the ultraviolet or UV-sensitive *SWS1* ( $\lambda_{\max}$ : 347–383  
218 nm) with age ( $p = 0.005$ ; Table 1). Although *SWS1* expression is usually low, it seems to be  
219 expressed more in early stages throughout the phylogeny (Fig 1, Table 1). On one hand, UV  
220 radiation can result in larval mortality; to mitigate negative effects of exposure, UV avoidance  
221 through detection of ultraviolet light and adjustments of vertical position is expected (Ylönen  
222 et al. 2004, Guggiana-Nilo and Engert 2016). On the other hand, distinguishing wavelengths  
223 belonging to the UV part of the visual spectrum aids younger individuals that feed on  
224 zooplankton (Browman et al. 1994, Flamarique et al. 2013, Fattah Ibrahim et al. 2015). With  
225 ageing and a shift in diet, UV opsin expression might become irrelevant for some species (Britt  
226 et al. 2001), thus potentially explaining why some adults do not express *SWS1* (e.g. *Naso*  
227 *brevirostris*, *Oryzias latipes*), while others still do (e.g. *Danio rerio*, *Poecilia reticulata*,  
228 cichlids) (Fig 1, Supp Table). Adult expression of *SWS1*, when seen, seems to play a role in  
229 species and/or colour discrimination and mate selection (guppies: Smith et al. 2002;  
230 damselfishes: Siebeck et al. 2010; cichlids: Carleton et al. 2016), male aggression  
231 (sticklebacks: Rick and Bakker 2008) or is associated with migration events (salmonids:  
232 Allison et al., 2006). The blue sensitive *SWS2* cone opsin ( $\lambda_{\max}$ : 397–482 nm) expression  
233 generally increases with age and generally replaces the *SWS1* gene in the single cones (Figs 1  
234 and 2, Supp Table Table 1). Interestingly, while some fish (e.g., sturgeons and cyprinids) seem  
235 to ontogenetically decrease the proportion of both *SWS1* and *SWS2* opsins, other fish groups

236 (e.g., cichlids) replace one type by another (Fig 3). This switch in single cone opsin expression  
237 between *SWS1* and *SWS2* has been shown before e.g., by Spady et al. (2006) in Nile tilapia or  
238 by Cheng and Flamarique (2007) in rainbow trout, and it mostly keeps the total single cone  
239 opsin expression similar between different developmental stages (Fig. 2).

240

241 **Middle and long-wavelength sensitive opsins in double cones:** The ontogenetic switch in  
242 expression occurs also between the green-sensitive *RH2* ( $\lambda_{\max}$ : 452–537 nm) and the red-  
243 sensitive *LWS* ( $\lambda_{\max}$ : 501–573 nm) cone opsin types; plus switching between different *RH2*  
244 copies also commonly occurs (Fig 3). Values for these typically double-cone opsins vary  
245 considerably across the fish phylogeny, albeit a possible weak general trend of a decrease in  
246 relative expression of *RH2*, and an increase of *LWS* with age is noticeable (Figs 1 and 2, Supp  
247 Table; not significant – Table 1), except for groups that completely lost the *LWS* opsin gene.  
248 In general, medium-wavelength opsins appear to be of use to all stages (Figs 1 and 2, Supp  
249 Table), perhaps due to general presence of corresponding wavelengths in most habitats. Our  
250 overview data further seem to show that freshwater species exhibiting the dominance of red-  
251 sensitive *LWS* opsin gene expression, whereas in marine species, green-sensitive *RH2* gets to  
252 be more dominant (with exceptions) (Fig 1). Namely, for species inhabiting the spectrally  
253 narrower deep sea at least during certain parts of their lives (Stomiiformes, Aulopiformes,  
254 Trachichthyiformes, Anguilliformes, Gadiformes), *RH2* seems to be the most important, if not  
255 the only cone opsin expressed (Fig 1, Lupše et al. 2021). On the other hand, expression of *LWS*  
256 in adults might be a response to inhabiting freshwater habitats, such as turbid rivers and murky,  
257 eutrophic lakes (e.g., Lake Victoria) where usually, longer wavelengths penetrate to greater  
258 depths and are the most prevalent colour of the ambient light (Hofmann et al. 2009, Carleton  
259 et al. 2016). Expression of *LWS* is also beneficial for foraging in herbivorous reef fishes,  
260 providing them with the visual ability to discriminate benthic algae from coral reef  
261 backgrounds (Marshall et al. 2003, Stieb et al. 2017). In some cases, increased *LWS* expression  
262 and expanded *LWS* repertoires might also be explained by sexual selection (e.g. in Poeciliidae),  
263 where females evolved mate preferences for red and orange male coloration (Watson et al.  
264 2011).

265

266 **Age-specific cone opsin gene copies in the selected taxa.** We have specifically focused and  
267 de-novo sequenced retina transcriptomes of larvae/juveniles and adults of 14 actinopterygian  
268 species belonging to five orders spanning the ray-finned fish phylogeny. Apart from the  
269 aforementioned rod vs. cone identity assessed by *GNAT* genes, we have additionally focused



270 on switches between copies of the same opsin type in the selected taxa (Fig 3, Supp Table).  
271 Namely, we studied the visual opsin gene repertoire in two basal non-teleost fish groups,  
272 bichirs (Polypteriformes) and sturgeons (Acipenseriformes), and in teleost riverine cyprinids  
273 (Cypriniformes, Ostariophysi), crater-lake cichlids (Cichliformes, Euteleostei) and deep-sea  
274 pearleyes and sabretooths (Aulopiformes, Euteleostei). The overall expression patterns are in  
275 most cases in accord with the general patterns discussed above (Figure 3, Supp Table), with  
276 exceptions seen in the deep-sea fishes (based on our earlier data from Lupše et al. 2021).

277 In all species but the bichir, we found multiple copies within at least one opsin gene  
278 type, namely within the rod *RH1* opsin, and cone *SWS2* and *RH2* opsins. In some species  
279 (cyprinids, sturgeon, *Scopelarchus* spp.) we found simultaneous expression of two rod *RH1*  
280 copies (Fig 1, Supp Table). All three groups possess the two *RH1* genes in their genome  
281 resulting from three independent ancestral gene duplication events (Musilova et al. 2021, Lupše  
282 et al. 2021). The *RH1* gene duplicates were lost in the later evolution of the euteleost crown  
283 group, and hence most teleost species carry only one *RH1* copy, a phenomenon similar to that  
284 seen in “non-fish” vertebrates. These *RH1* copies do not show any sign of ontogenetic switch  
285 in studied species, as known e.g. for eels (Hope et al., 1998). On the other hand, we detected  
286 several cases of stage-specific copies within cone opsin genes. While *Acipenser ruthenus* and  
287 *Abramis brama* + *Vimba vimba* express only one *SWS2* copy, cichlids express two different  
288 *SWS2* genes (Fig 3, Supp Table); this corresponds to multiple copies found in their genome  
289 due to the neoteleost- and percomorph-specific *SWS2* gene duplications (Cortesi et al. 2015).  
290 Most examined species show an expanded *RH2* repertoire (Fig 3, Supp Table) and the existence  
291 of clearly larval and adult-specific copies has been observed in cyprinids, cichlids and in the  
292 deep-sea aulopiforms (Fig. 3). Expression of multiple copies might enhance colour vision by  
293 increased spectral resolution useful in a particular environment, however reasons for these  
294 opsin switches are not yet completely understood. The presence of such stage-specific copies  
295 means that species adjust their vision to differing light environments not only through a change  
296 in opsin class expression, but also through preferential expression of opsin copies within a  
297 single class. In cichlids, a group for which the development of visual system is probably best  
298 understood, a shift to longer-wavelength copies is generally observed within a single opsin type  
299 (*RH2A* copies replacing *RH2B* with age) or among single-cone opsins (*SWS2* replacing *SWS1*)  
300 and has been reported before for different groups of cichlids (e.g., Malawi, Carleton et al. 2008;  
301 Nile tilapia, Spady et al., 2006).

302 Mesopelagic deep-sea aulopiform species have a limited repertoire of cone opsin  
303 classes that reflects living in photon-depleted depths (Musilova et al. 2019, Lupše et al. 2021).

304 *Scopelarchus* spp. and *Coccorella atlantica* express only one cone opsin class, namely *RH2*  
305 (Fig 3, Supp Table). However, both expanded their *RH2* repertoires and express larval- and  
306 adult-specific copies that are thought to be functionally different and most likely best respond  
307 to different wavelengths shallow-water epipelagic larvae and mesopelagic deep-water adults  
308 encounter (Fig 3, Supp Table) (Lupše et al. 2021). Genomic analyses by Lupše et al. (2021)  
309 reveal a total of three, and seven *RH2* cone opsin copies within the genomes of *Coccorella*  
310 *atlantica* and *Scopelarchus michaelsarsi*, respectively. Mesopelagic fish lineages in some cases  
311 expand rod opsin repertoires, which are better suited for dim-light conditions (Musilova et al.  
312 2019, Lupše et al. 2021). *Coccorella* and *Scopelarchus*, however, seem to inhabit relatively  
313 shallower and photon-richer depths than some other deep-sea fishes, such as Stomiiformes, and  
314 might thus benefit also from having extra copies of cone opsins (Lupše et al. 2021).

315 We have collected a robust data set combining not only our own, but also publicly  
316 available genetic data, deposited in databases. This allowed us to detect shared vs. specific  
317 expression patterns among different fish groups. We are aware that the collected data set has  
318 certain limitations and that many factors could not be controlled in this study. For example,  
319 this data set is highly dependent on publicly available material, so there is no control over  
320 several potentially relevant factors, such as the sampling conditions, intraspecific variability,  
321 other tissues sequenced together with the eyes (as in the entire embryos), etc. Since not all  
322 stages are available for all species, we do not present any typical “developmental time series”  
323 but rather snapshots of embryos, larvae, juveniles and adults; consequently, more subtle or  
324 time-restricted expression patterns could not be detected here. For the purpose of statistical  
325 analyses, we have restricted the public data set only to species with two (or more) stages found  
326 (Figure 2). To complement the public data we also include our own, controlled data in more  
327 detail (Figure 3). Despite certain limitations, our combined dataset provides robust evidence  
328 for expression patterns shared across distantly related fish groups, as it highlights general  
329 trends, and more detailed conclusions achieved through in-detail analyses of species  
330 specifically sequenced within this study.

331

## 332 **Conclusions**

333 To conclude, this study aims to identify general patterns of the visual opsin gene expression  
334 shared among ray-finned fishes, and to detect similarities in the ontogenetic changes between  
335 opsin gene types. We found that the rod:cone opsins ratio increased with age in fish species,  
336 supporting the conserved cone-to-rod developmental pathway. We also noted the increased  
337 importance of the long-wavelength sensitive *LWS* opsin genes, and the decreased importance

338 of the short-wavelength sensitive *SWS1* opsin gene, observed across ray-finned fish phylogeny  
339 (e.g. in sturgeons, cyprinids and cichlids). We have further detected the existence of different  
340 stage-specific *RH2* copies, which are switched during development. To conclude, fish visual  
341 systems are evolutionary and developmentally very dynamic and future studies focused on  
342 particular fish groups promise to throw further light on exact mechanisms, patterns and reasons  
343 for this extreme sensory system diversity.

344

### 345 **Acknowledgements**

346 We would like to express our deep gratitude to Adrian Indermaur and Petra Horká for their  
347 help with the field sampling. We thank local people of the Barombi and Bemé village to allow  
348 us to fish in the Barombi Mbo and Bermin lakes, and the Ministry of Scientific Research and  
349 Innovation in Cameroon to grant us research permits. NL and ZM were supported by the Swiss  
350 National Science Foundation (PROMYS – 166550), ZM by the PRIMUS Research Programme  
351 (Charles University), the Czech Science Foundation (21-31712S) and the Basler Stiftung fuer  
352 Experimentelle Zoologie. VT and PK were supported by GAUK (1767618). VK was funded  
353 by Ministry of Education, Youth and Sports of the Czech Republic – the project Reproductive  
354 and Genetic Procedures for Preserving Fish Biodiversity and Aquaculture  
355 (CZ.02.1.01/0.0/0.0/16\_025/0007370).

356 Table 1: Statistical comparison between the younger and older developmental changes for 32  
357 ray-finned fish genera. Summary of beta regression models specifically aimed at proportional  
358 data sets (opsin expression as a dependent variable from developmental stage) with the  
359 obtained p-values. Alpha levels of significance after the Bonferroni correction additionally  
360 marked as equivalent to: < 0.001\*\*\* and < 0.05\*.

361

| opsin gene(s) | p-value     |
|---------------|-------------|
| <i>SWS1</i>   | 0.005 *     |
| <i>SWS2</i>   | 0.040       |
| <i>RH2</i>    | 0.469       |
| <i>LWS</i>    | 0.675       |
| rods          | 1.6e-09 *** |
| cones         | 7.6e-10 *** |
| single cones  | 0.950       |
| double cones  | 0.302       |

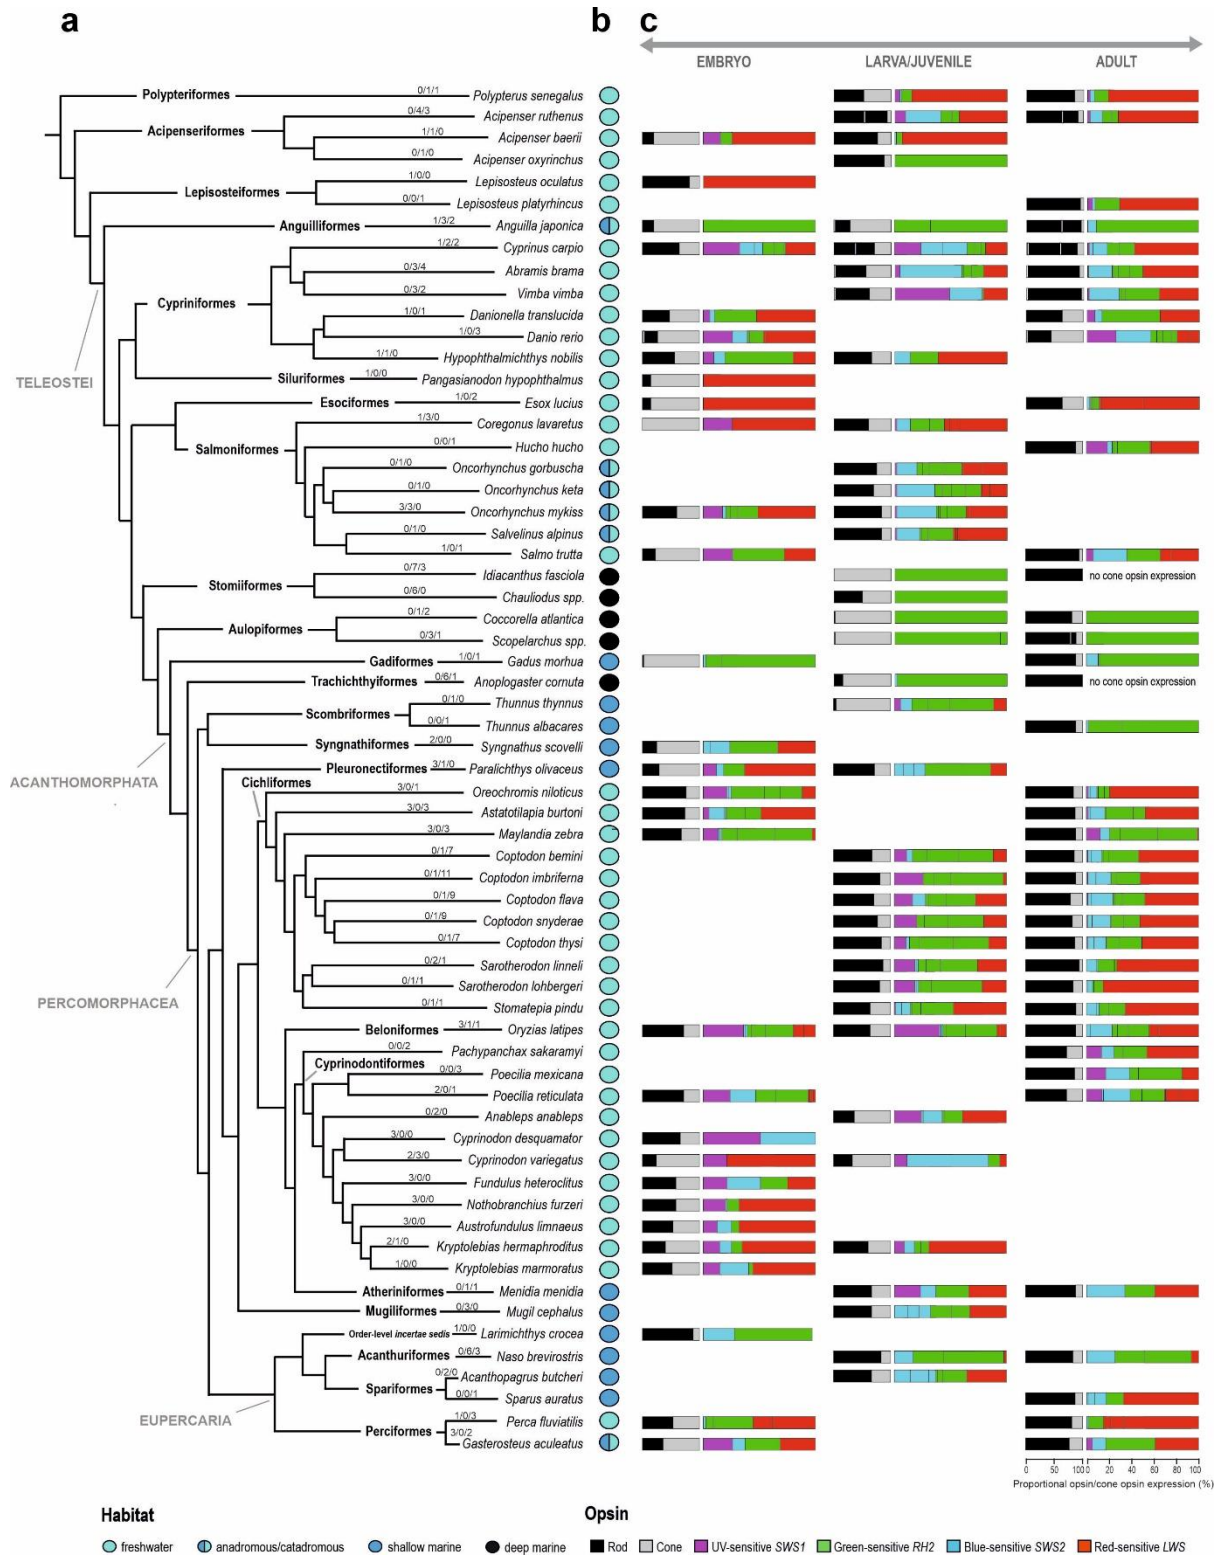

362

363 **Fig. 1: Opsin gene expression in different developmental stages of ray-finned fishes (Actinopterygii).** (A)  
 364 Simplified phylogeny of the 63 species, belonging to 23 orders, for which the transcriptomes were analysed  
 365 (topology after Betancur et al. 2017). Numbers above branches represent number of individuals per  
 366 developmental stage analysed (embryo/larva+juvenile/adult). (B) Information on habitat preference, obtained  
 367 from <https://www.fishbase.de>. Separation between the shallow and deep marine species is 200m. Information on  
 368 depth obtained from <https://obis.org/>. (C) Proportional opsin gene expression (horizontal bars) at different

369 developmental stages. First (shorter) bar represents mean proportional expression of rod and cone opsins. Cone  
 370 opsin expression (grey) is depicted as the sum of the expression of all four classes of cone opsin genes (SWS1,  
 371 SWS2, RH2, and LWS). If several rod opsin genes (black) were expressed, the different proportions of their  
 372 expression are distinguished with white vertical bars. Second (longer) bar represents mean proportional  
 373 expression of different cone opsins. Black vertical bars within gene classes separate different copies, if co-  
 374 expressed. For details, see Supplementary Table.  
 375  
 376

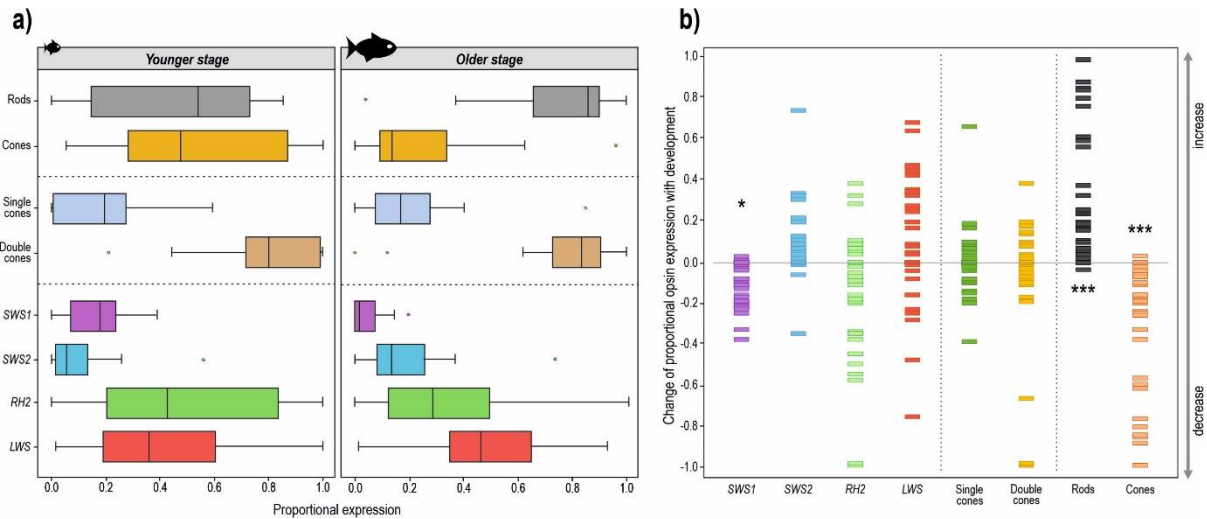

377  
 378 **Fig. 2: General patterns of age-related opsin expression changes.** (A) Interquartile ranges (25<sup>th</sup> and 75<sup>th</sup>  
 379 percentiles) and whiskers show data dispersion (proportional expression) across different opsins for the youngest  
 380 and oldest analysed stage. Data medians are presented as solid vertical lines. To avoid over-representation of  
 381 certain taxa (e.g. five Coptodon species), data points (N=32) represent mean genus values, and are comprised  
 382 only of species that had at least two developmental stages analysed. (B) Change of opsin expression  
 383 (positive/negative) with development, calculated as a difference between the mean opsin expression in the oldest  
 384 and the youngest stage of a certain genus. Resulting values are represented by rectangles (N=32), centered at the  
 385 mean. Lower half of the plot (values below 0.0) shows a decrease, and the upper half (values above 0.0) an  
 386 increase in proportional expression with age. Significant differences found by beta regression models are marked  
 387 by asterisks (see Table 1 for details).

388

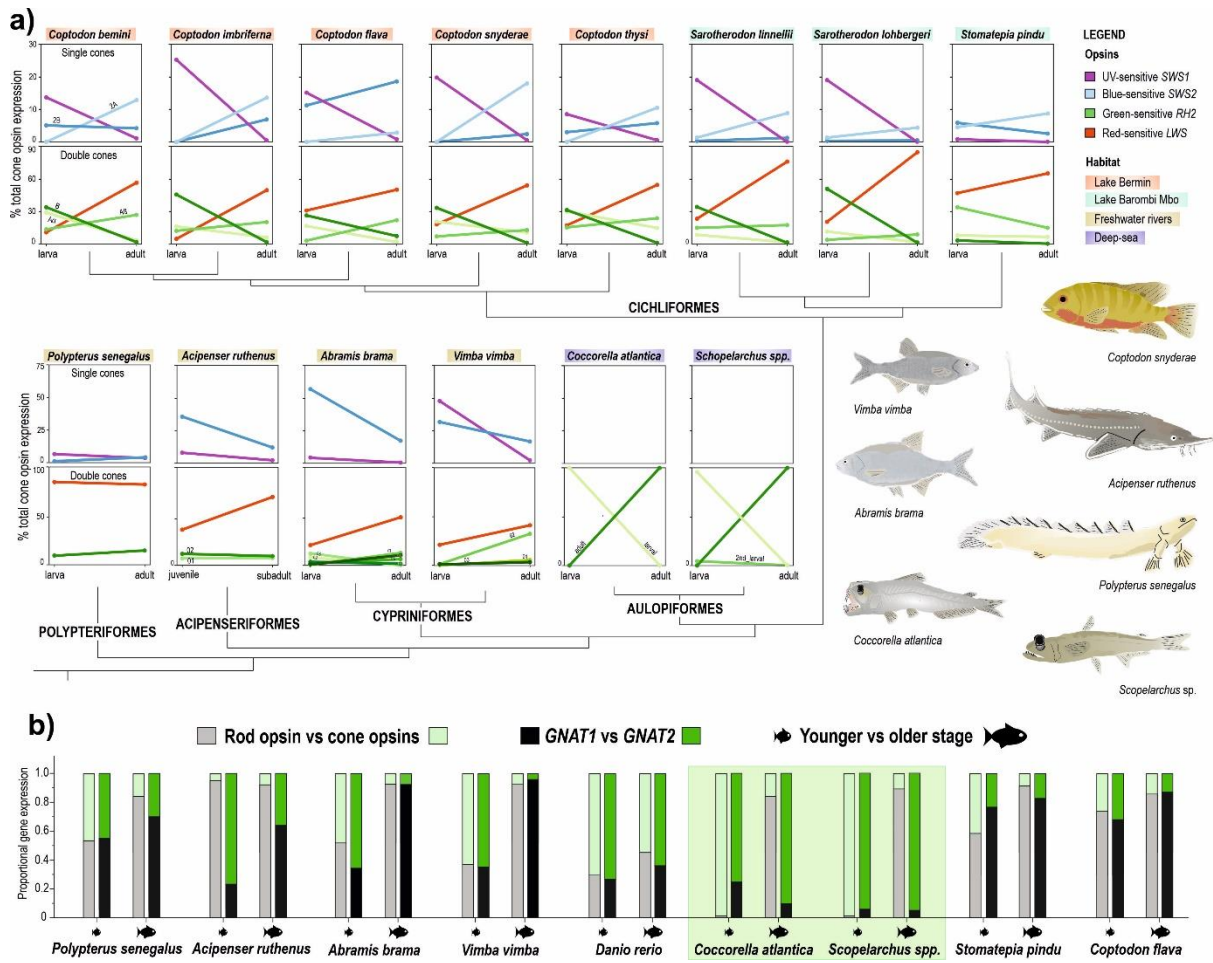

389

390 **Fig. 3: Cone opsin gene switches, age-specific copies and phototransduction cascade gene expression of**  
 391 **representative taxa specifically sequenced for this study.** (A) Detailed presentation of ontogenetic changes of  
 392 opsin expression in selected polypteriform, acipenseriform, cypriniform, aulopiform and cichliform species-  
 393 Interconnected dots are coloured according to specific single and double cone opsins and present mean  
 394 expression values for specific developmental stages. In cases of gene duplications, copies are named and coloured  
 395 with different shades. For details on number of individuals and exact values, see Supplementary Table. (B)  
 396 Ontogenetic changes of rod/cone opsin gene expression, and to it related shifts in expression of phototransduction  
 397 cascade genes *GNAT1* (rod-specific) and *GNAT2* (cone-specific) for selected teleost taxa. Highlighted in green  
 398 are special cases of the two aulopiform species that exhibit a discordance between the dominating opsin type  
 399 (rod-specific) and phototransduction cascade genes (cone-specific) in adults (Lupše et al. 2021).

400 **References:**

- 401 **Allison WT, Dann SG, Veldhoen KM, Hawryshyn CW.** 2006 Degeneration and  
402 regeneration of ultraviolet cone photoreceptors during development in rainbow trout. *Journal*  
403 *of Comparative Neurology*, 499(5), 702-715.
- 404 **Andrews S.** 2017. FastQC: a quality control tool for high throughput sequence data. 2010.
- 405 **Betancur-R R. et al.** 2017 Phylogenetic classification of bony fishes. *BMC evolutionary*  
406 *biology*, 17(1), 162
- 407 **Blaxter JHS.** 1986 Development of sense organs and behaviour of teleost larvae with special  
408 reference to feeding and predator avoidance. *Transactions of the American Fisheries Society*,  
409 115,98–114
- 410 **Browman HI, Flamarique IN, Hawryshyn CW.** 1994 Ultraviolet photoreception contributes  
411 to prey search behavior in two species of zooplanktivorous fishes. *J. Exp. Biol.* 186: 187–198.
- 412 **Carleton KL, Dalton BE, Escobar-Camacho D, Nandamuri SP.** 2016 Proximate and  
413 ultimate causes of variable visual sensitivities: insights from cichlid fish radiations. *Genesis*,  
414 54(6), 299-325.
- 415 **Carleton KL, Escobar-Camacho D, Stieb SM, Cortesi F, Marshall NJ.** 2020. Seeing the  
416 rainbow: mechanisms underlying spectral sensitivity in teleost fishes. *Journal of Experimental*  
417 *Biology*, 223(8).
- 418 **Carleton KL, Kocher TD.** 2001 Cone opsin genes of African cichlid fishes: tuning spectral  
419 sensitivity by differential gene expression. *Molecular Biology and Evolution*, 18(8), 1540-  
420 1550.
- 421 **Carleton KL, Spady TC, Streelman JT, Kidd MR, McFarland WN, Loew ER.** 2008 Visual  
422 sensitivities tuned by heterochronic shifts in opsin gene expression. *BMC Biology*, 6(1), 1-14.
- 423 **Carvalho PS, Noltie DB, Tillitt DE.** 2002 Ontogenetic improvement of visual function in the  
424 medaka *Oryzias latipes* based on an optomotor testing system for larval and adult fish. *Animal*  
425 *Behaviour*, 64(1), 1-10.
- 426 **Chang CH, Catchen J, Moran RL, Rivera-Colón AG, Wang YC, Fuller RC.** 2021  
427 Sequence analysis and ontogenetic expression patterns of cone opsin genes in the bluefin  
428 killifish (*Lucania goodei*). *Journal of Heredity*. 112(4), 357-366.
- 429 **Chang CH, Wang YC, Shao YT, Liu SH.** 2020 Phylogenetic analysis and ontogenetic  
430 changes in the cone opsins of the western mosquitofish (*Gambusia affinis*). *PloS one*, 15(10),  
431 e0240313.
- 432 **Cheng CL, Flamarique IN.** 2007 Chromatic organization of cone photoreceptors in the retina  
433 of rainbow trout: single cones irreversibly switch from UV (SWS1) to blue (SWS2) light



- 434 sensitive opsin during natural development. *Journal of Experimental Biology*. 210(23), 4123-  
435 4135
- 436 **Cortesi F, et al.** 2021. Multiple ancestral duplications of the red-sensitive opsin gene (LWS)  
437 in teleost fishes and convergent spectral shifts to green vision in gobies. *bioRxiv*:  
438 <https://doi.org/10.1101/2021.05.08.443214>.
- 439 **Cortesi F et al.** 2016 From crypsis to mimicry: changes in colour and the configuration of the  
440 visual system during ontogenetic habitat transitions in a coral reef fish. *Journal of Experimental*  
441 *Biology*, 219(16), 2545-2558.
- 442 **Cortesi F, et al.** 2015 Ancestral duplications and highly dynamic opsin gene evolution in  
443 percomorph fishes. *Proceedings of the National Academy of Sciences*, 112(5), 1493-1498.
- 444 **Cottrill PB, Davies WL, Bowmaker JK, Hunt DM, Jeffery G.** 2009 Developmental  
445 dynamics of cone photoreceptors in the eel. *BMC Developmental Biology*, 9(1), 1-9.
- 446 **Cribari-Neto F & Zeileis A.** 2010. Beta regression in R. *Journal of statistical software*, 34, 1-  
447 24.
- 448 **De Busserolles F, Marshall NJ, Collin SP.** 2014. The eyes of lanternfishes (Myctophidae,  
449 teleostei): novel ocular specializations for vision in dim light. *Journal of Comparative*  
450 *Neurology*, 522(7), 1618-1640.
- 451 **de Busserolles F, et al.** 2017 Pushing the limits of photoreception in twilight conditions: The  
452 rod-like cone retina of the deep-sea pearlsides. *Science advances*, 3(11), eaao4709.
- 453 **Evans BI, Browman HI** 2004 Variation in the development of the fish retina. In *American*  
454 *Fisheries Society Symposium* (Vol. 40, pp. 145-166).
- 455 **Evans BI, Fernald RD.** 1990 Metamorphosis and fish vision. *Journal of neurobiology*, 21(7),  
456 1037-1052.
- 457 **Fattah Ibrahim A, Castilho Noll MSM, Valenti WC.** 2015. Zooplankton capturing by Nile  
458 Tilapia, *Oreochromis niloticus* (Teleostei: Cichlidae) throughout post-larval development.  
459 *Zoologia (Curitiba)* 32:469–475.
- 460 **Fernald RD.** 1985 Growth of the teleost eye: novel solutions to complex constraints.  
461 *Environmental Biology of Fishes*, 13(2), 113-123.
- 462 **Flamarique IN.** 2013 Opsin switch reveals function of the ultraviolet cone in fish foraging.  
463 *Proceedings of the Royal Society B: Biological Sciences*, 280(1752), 20122490.
- 464 **Fogg LG, Cortesi F, Lecchini D, Gache C, Marshall NJ, De Busserolles F.** 2022.  
465 Development of dim-light vision in the nocturnal reef fish family Holocentridae I: retinal gene  
466 expression. *Journal of Experimental Biology*.

- 467 **Fuiman LA.** 1993 Development of predator evasion in Atlantic herring, *Clupea harengus* L.  
468 *Animal Behaviour*, 45(6), 1101-1116.
- 469 **Fuiman LA, Delbos BC.** 1998 Developmental changes in visual sensitivity of red drum,  
470 *Sciaenops ocellatus*. *Copeia*, 936-943.
- 471 **Guggiana-Nilo DA, Engert F.** 2016 Properties of the visible light phototaxis and UV  
472 avoidance behaviors in the larval zebrafish. *Frontiers in behavioral neuroscience*, 10, 160.
- 473 **Hagedorn M, Fernald RD.** 1992. Retinal growth and cell addition during embryogenesis in  
474 the teleost, *Haplochromis burtoni*. *Journal of Comparative Neurology*, 321(2), 193-208.
- 475 **Härer A, Torres-Dowdall J, Meyer A.** 2017. Rapid adaptation to a novel light environment:  
476 the importance of ontogeny and phenotypic plasticity in shaping the visual system of  
477 Nicaraguan Midas cichlid fish (*Amphilophus citrinellus* spp.). *Molecular ecology*, 26(20),  
478 5582-5593.
- 479 **Helfman G, Collette BB, Facey DE, Bowen BW.** 2009. The diversity of fishes: biology,  
480 evolution, and ecology (John Wiley & Sons: West Sussex, UK).
- 481 **Helvik JV, Drivenes Ø, Harboe T, Seo HC.** 2001 Topography of different photoreceptor cell  
482 types in the larval retina of Atlantic halibut (*Hippoglossus hippoglossus*). *Journal of*  
483 *Experimental Biology*, 204(14), 2553-2559.
- 484 **Hofmann CM, O'Quin KE, Marshall NJ, Cronin TW, Seehausen O, Carleton KL.** 2009.  
485 The eyes have it: regulatory and structural changes both underlie cichlid visual pigment  
486 diversity. *PLoS biology*, 7(12), e1000266.
- 487 **Hope A, Partridge J, Hayes P.** 1998. Rod opsin shifts in the European eel, *Anguilla anguilla*  
488 (L). *Proc. R. Soc. Lond B*, 265(January), 869–874.
- 489 **Hunt DM, Hankins MW, Collin SP, Marshall NJ.** 2014. Evolution of visual and non-visual  
490 pigments (Vol. 4). Boston, MA: Springer.
- 491 **Hunt DM, Fitzgibbon J, Slobodyanyuk SJ, Bowmaker JK, Dulai KS.** 1997 Molecular  
492 evolution of the cottoid fish endemic to Lake Baikal deduced from nuclear DNA evidence.  
493 *Molecular Phylogenetics and Evolution*, 8(3), 415-422.
- 494 **Hunter JR, Coyne KM.** 1982 The onset of schooling in northern anchovy larvae, *Engraulis*  
495 *mordax*. *CalCOFI Rep*, 23, 246-251.
- 496 **Kearse M, et al.** 2012. Geneious Basic: an integrated and extendable desktop software  
497 platform for the organization and analysis of sequence data. *Bioinformatics*, 28(12), 1647-  
498 1649.
- 499 **King JR, McFarlane GA.** 2003. Marine fish life history strategies: applications to fishery  
500 management', *Fisheries Management and Ecology*, 10, 249-64

- 501 **La Vail MM, Rapaport DH, Rakic P.** 1991. Cytogenesis in the monkey retina. *J. Comp.*  
502 *Neurol.* 309, 86-114. doi:10.1002/cne.903090107.
- 503 **Lamb TD.** 2013. Evolution of phototransduction, vertebrate photoreceptors and retina.  
504 *Progress in retinal and eye research*, 36, 52-119.
- 505 **Lupše N, et al.** 2021 Visual gene expression reveals a cone to rod developmental progression  
506 in deep-sea fishes. *Molecular Biology and Evolution* 38(12):5664-5677
- 507 **Magnuson JT, Stieglitz JD, Garza SA, Benetti DD, Grosell M, Roberts AP.** 2020  
508 Development of visual function in early life stage mahi-mahi (*Coryphaena hippurus*). *Marine*  
509 *and Freshwater Behaviour and Physiology*, 53(5-6), 203-214.
- 510 **Malinsky M, et al.** 2015 Genomic islands of speciation separate cichlid ecomorphs in an East  
511 African crater lake. *Science*. 350(6267), 1493–8. <http://doi.org/10.1126/science.aac9927>
- 512 **Manousaki et al.** 2013 Parsing parallel evolution: ecological divergence and differential gene  
513 expression in the adaptive radiations of thick-lipped Midas cichlid fishes from Nicaragua.  
514 *Molecular ecology*, 22(3), 650-669.
- 515 **Mariani AP, Boycott BB.** 1986. Photoreceptors of the larval tiger salamander  
516 retina. *Proceedings of the Royal Society of London. Series B. Biological Sciences*, 227: 483-  
517 92.
- 518 **Marshall NJ, Jennings K, McFarland WN, Loew ER, Losey GS.** 2003 Visual biology of  
519 Hawaiian coral reef fishes. III. Environmental light and an integrated approach to the ecology  
520 of reef fish vision. *Copeia*, 2003(3), 467-480.
- 521 **Mears AJ, et al.** 2001. *Nrl* is required for rod photoreceptor development. *Nature genetics*,  
522 29(4), 447-452.
- 523 **Musilova Z, et al.** 2019a. Vision using multiple distinct rod opsins in deep-sea fishes. *Science*,  
524 364(6440), 588-592.
- 525 **Musilova Z, Salzburger W, Cortesi F.** 2021. The visual opsin gene repertoires of teleost  
526 fishes: evolution, ecology, and function. *Annual review of cell and developmental biology*, 37,  
527 441-468.
- 528 **Musilova Z, Cortesi F.** 2021 Multiple ancestral and a plethora of recent gene duplications  
529 during the evolution of the green sensitive opsin genes (*RH2*) in teleost fishes. *bioRxiv*.
- 530 **Musilova, et al.** 2019 Evolution of the visual sensory system in cichlid fishes from crater lake  
531 Barombi Mbo in Cameroon. *Molecular Ecology* 5010–5031. <http://doi.org/10.1111/mec.15217>
- 532 **Pankhurst PM, Pankhurst NW, Montgomery JC.** 1993. Comparison of behavioural and  
533 morphological measures of visual acuity during ontogeny in a teleost fish, *Forsterygion*  
534 *varium*, Tripterygiidae (Forster, 1801). *Brain, Behavior and Evolution*, 42(3), 178-188.

- 535 **Pointer MA, Carvalho LS, Cowing JA, Bowmaker JK, Hunt DM.** 2007. The visual  
536 pigments of a deep-sea teleost, the pearl eye Scopelarchus analis. *Journal of Experimental*  
537 *Biology*, 210(16), 2829-2835.
- 538 **Raymond PA.** 1995. Development and morphological organization of photoreceptors.  
539 *Neurobiology and Clinical Aspects of the Outer Retina* (pp. 1-23). Springer, Dordrecht.
- 540 **Ricci V, Ronco F, Musilova Z, Salzburger W.** 2022. Molecular evolution and depth-related  
541 adaptations of rhodopsin in the adaptive radiation of cichlid fishes in Lake Tanganyika.  
542 *Molecular Ecology*
- 543 **Rick IP, Bakker TC.** 2008 Males do not see only red: UV wavelengths and male territorial  
544 aggression in the three-spined stickleback (*Gasterosteus aculeatus*). *Naturwissenschaften*,  
545 95(7), 631-638.
- 546 **Roux N et al.** 2022. The multi-level regulation of clownfish metamorphosis by thyroid  
547 hormones, bioRxiv, 10.1101/2022.03.04.482938.
- 548 **Savelli I, Novales Flamarique I, Iwanicki T, Taylor JS.** 2018. Parallel opsin switches in  
549 multiple cone types of the starry flounder retina: tuning visual pigment composition for a  
550 demersal life style. *Scientific Reports*, 8, 4763.
- 551 **Schott RK, Bhattacharyya N, Chang BS.** 2019. Evolutionary signatures of photoreceptor  
552 transmutation in geckos reveal potential adaptation and convergence with snakes. *Evolution*,  
553 73(9), 1958-1971.
- 554 **Sernagor E, Eglén S, Harris B, Wong R.** 2006. Retinal development. Cambridge University  
555 Press.
- 556 **Shand J, Hart NS, Thomas N, Partridge JC.** 2002. Developmental changes in the cone visual  
557 pigments of black bream *Acanthopagrus butcheri*. *Journal of Experimental Biology*, 205(23),  
558 3661-3667.
- 559 **Shen YC, Raymond PA.** 2004. Zebrafish cone-rod (*crx*) homeobox gene promotes  
560 retinogenesis. *Developmental biology*, 269(1), 237-251.
- 561 **Siebeck UE, Parker AN, Sprenger D, Mäthger LM, Wallis G.** 2010 A species of reef fish  
562 that uses ultraviolet patterns for covert face recognition. *Current Biology*, 20(5), 407-410.
- 563 **Simoés BF et al.** (2016). Multiple rod–cone and cone–rod photoreceptor transmutations in  
564 snakes: evidence from visual opsin gene expression. *Proceedings of the Royal Society B:*  
565 *Biological Sciences*, 283(1823), 20152624.
- 566 **Smith EJ, Partridge JC, Parsons KN, White EM, Cuthill IC, Bennett AT, Church SC.**  
567 2002 Ultraviolet vision and mate choice in the guppy (*Poecilia reticulata*). *Behavioral*  
568 *Ecology*, 13(1), 11-19.

- 569 **Stieb SM, Cortesi F, Sueess L, Carleton KL, Salzburger W, Marshall NJ.** 2017 Why UV  
570 vision and red vision are important for damselfish (Pomacentridae): structural and expression  
571 variation in opsin genes. *Molecular ecology*, 26(5), 1323-1342.
- 572 **Stieb SM, Carleton KL, Cortesi F, Marshall NJ, Salzburger W.** 2016 Depth-dependent  
573 plasticity in opsin gene expression varies between damselfish (Pomacentridae) species.  
574 *Molecular ecology*, 25(15), 3645-3661.
- 575 **Sugawara T, et al.** 2005 Parallelism of amino acid changes at the *RH1* affecting spectral  
576 sensitivity among deep-water cichlids from Lakes Tanganyika and Malawi. *Proceedings of the*  
577 *National Academy of Sciences*, 102(15), 5448-5453.
- 578 **Tettamanti V, de Busserolles F, Lecchini D, Marshall NJ, Cortesi F.** 2019 Visual system  
579 development of the spotted unicornfish, *Naso brevirostris* (Acanthuridae). *Journal of*  
580 *Experimental Biology*, 222(24).
- 581 **Valen R, et al.** 2016 The two-step development of a duplex retina involves distinct events of  
582 cone and rod neurogenesis and differentiation. *Developmental biology*, 416(2), 389-401.
- 583 **Valen R, Karlsen R, Helvik JV.** 2018 Environmental, population and life-stage plasticity in  
584 the visual system of Atlantic cod. *Journal of Experimental Biology*, 221(1), jeb165191.
- 585 **Wagner HJ, Partridge JC, Douglas RH.** 2019. Observations on the retina and ‘optical fold’ of  
586 a mesopelagic sabretooth fish, *Evermanella balbo*. *Cell and tissue research*, 378(3), 411-425.
- 587 **Watson CT, et al.** 2011. Gene duplication and divergence of long wavelength-sensitive opsin  
588 genes in the Guppy, *Poecilia reticulata*. *J Mol Evol.* 72(2):240–252.
- 589 **Ylönen O, Heikkilä J, Karjalainen J.** 2004 Metabolic depression in UV-B exposed larval  
590 coregonids. *Annales Zoologici Fennici* (pp. 577-585).
- 591 **Yokoyama S.** 2008 Evolution of dim-light and color vision pigments. *Annu. Rev. Genomics*  
592 *Hum. Genet.*, 9, 259-282.
- 593 **Yokoyama S, Jia H.** 2020 Origin and adaptation of green-sensitive (*RH2*) pigments in  
594 vertebrates. *FEBS Open Bio*, 10(5), 873-882.
