# 1 **Developmental changes of opsin gene expression in ray-finned fishes** 2 **(Actinopterygii)**

3

4 Nik Lupše<sup>1\*</sup>, Monika Kłodawska<sup>1</sup>, Veronika Truhlářová<sup>1</sup>, Prokop Košátko<sup>1</sup>, Vojtěch Kašpar<sup>2</sup>,  
5 Arnold Roger Bitja Nyom<sup>3,4</sup>, Zuzana Musilova<sup>1\*</sup>

6

7 <sup>1</sup>Department of Zoology, Faculty of Science, Charles University, Vinicna 7, 12844 Prague,  
8 Czech Republic

9 <sup>2</sup>University of South Bohemia in České Budějovice, Faculty of Fisheries and Protection of  
10 Waters, South Bohemian Research Center of Aquaculture and Biodiversity of Hydrocenoses,  
11 Research Institute of Fish Culture and Hydrobiology, Zátiší 728/II, 389 25 Vodňany, Czech  
12 Republic

13 <sup>3</sup>Department of Management of Fisheries and Aquatic Ecosystems, University of Douala,  
14 Douala, Cameroon

15 <sup>4</sup>Department of Biological Sciences, University of Ngaoundéré, Ngaoundéré, Cameroon

16

17 \* Corresponding authors; [lupsen@natur.cuni.cz](mailto:lupsen@natur.cuni.cz), [zuzana.musilova@natur.cuni.cz](mailto:zuzana.musilova@natur.cuni.cz)

18

19 Keywords: opsin, evolution, Actinopterygii, development, vision, gene expression

20

## 21 **Abstract**

22 Fish often change their habitat and trophic preferences during development. Dramatic  
23 functional differences between embryos, larvae, juveniles and adults also concern sensory  
24 systems, including vision. Here we focus on the photoreceptors (rod and cone cells) in the  
25 retina and their gene expression profiles during the development. Using comparative  
26 transcriptomics on 63 species, belonging to 23 actinopterygian orders, we report general  
27 developmental patterns of opsin expression, mostly suggesting an increased importance of the  
28 rod opsin (*RH1*) gene and the long-wavelength sensitive (*LWS*) cone opsin, and a decreasing  
29 importance of the shorter wavelength sensitive cone opsin throughout development.  
30 Furthermore, we investigate in detail ontogenetic changes in 14 selected species (from  
31 Polypteriformes, Acipenseriformes, Cypriniformes, Aulopiformes and Cichliformes), and we  
32 report examples of expanded cone opsin repertoires, cone opsin switches (mostly within *RH2*)  
33 and increasing rod:cone ratio as evidenced by the opsin and phototransduction cascade genes.

34 Our findings provide molecular support for developmental stage-specific visual palettes of ray-  
35 finned fishes and shifts between, which most likely arose in response to ecological, behavioural  
36 and physiological factors.

37

## 38 INTRODUCTION

39 Fish visual systems are very diverse, and they vary in morphology, physiology and spectral  
40 sensitivity (Hunt et al. 2014, Carleton et al. 2020, Musilova et al. 2021). Vertebrate vision is  
41 enabled by cone and rod photoreceptors in the retina, which carry light-sensitive molecules  
42 composed of an opsin protein bound to a light absorbing, vitamin A-derived chromophore  
43 (Lamb 2013). In fishes, there are usually four types of cone opsins (*SWS1* and *SWS2*;  
44 commonly found in single cones, whereas *RH2* and *LWS* in double cones) used for photopic  
45 and colour vision, and one rod opsin (rhodopsin, *RH1* or Rho) for scotopic vision in dim-light  
46 conditions (Carleton et al. 2020). Through gene duplications followed by functional  
47 diversifications, extant teleost fishes reached a median of seven cone opsin genes within their  
48 genomes (Musilova et al. 2019a). Throughout the phylogeny, teleost genomes contain more  
49 copies of double-cone genes (middle and longer-wavelength sensitive; *RH2* and *LWS*) than that  
50 of single-cones (shorter-wavelength *SWS1* and *SWS2*). While the *SWS1* is often missing from  
51 the genome or seen in one, at best two copies (Musilova et al, 2021) and *SWS2* seen in up to  
52 three copies (Cortesi et al., 2015), teleost genomes can contain up to eight copies of *RH2*  
53 (Musilova & Cortesi, 2021) and up to five copies of *LWS* (Cortesi et al., 2021). Unlike cone  
54 opsins, rod opsin duplicates are rarely found, most often in mesopelagic lineages (Pointer et al.  
55 2007, Musilova et al. 2019a, Lupše et al. 2021). Higher copy number is considered beneficial  
56 by providing more “substrate” for selection, as well as for alternative gene expression of the  
57 variants within the opsin type.

58 The formation of the eye, and expression of opsin genes, starts already at the embryonic  
59 stage (Hagedorn and Fernald 1992, Carleton et al. 2008). Still, eyes continue to grow, and new  
60 photoreceptors are being added throughout life (Fernald 1985). Within the retina, cone  
61 photoreceptors are first to develop, followed by temporally and spatially distinct rods  
62 (Raymond 1995, Helvik et al. 2001, Shen & Raymond 2004). For example, in zebrafish,  
63 photoreceptor progenitor cells start out by first differentiating into cones before rods are added  
64 later during development (Sernagor et al. 2006). This cone-to-rod developmental sequence is  
65 likely shared across vertebrates (Atlantic cod: Valen et al. 2016; zebrafish: Sernagor et al. 2006;  
66 mice: Mears et al. 2001; rhesus monkey: La Vail et al. 1991) and appears to hold even for  
67 teleost species with an all-rod retina in the adult stage (Lupše et al. 2021).

68           Photic conditions can change spatially and temporally, resulting in a visually  
69 heterogeneous environment in which visual systems of fishes are expected to be under natural  
70 selection that favours those that match the local environment (Carleton et al. 2016). For  
71 example, longer and shorter wavelengths are scattered and filtered out with increasing water  
72 depth and consequently, fishes living in deep-water habitats such as sculpins of Lake Baikal  
73 (Hunt 1997), cichlids of lakes Malawi and Tanganyika (Sugawara et al. 2005; Ricci et al. 2022),  
74 and African crater lakes (Malinsky et al. 2015; Musilova et al. 2019b), as well as deep-sea  
75 fishes (Douglas et al. 2003, Lupše et al. 2021) have visual systems sensitive to the blue-green  
76 part of the visible spectrum. Adaptation can be achieved either through functional  
77 diversifications of opsin genes when mutations at key-spectral tuning sites shift the peak  
78 spectral sensitivity ( $\lambda_{\max}$ ) of the photopigment (Yokoyama 2008, 2020), or by regulation of the  
79 opsin gene expression. This can be achieved when a subset of opsin genes is expressed and  
80 altered among or within species and even within the same individuals during ontogeny  
81 (Carleton & Kocher 2001, Manousaki et al. 2013, Carleton 2016, Lupše et al. 2021).

82           Before reaching the juvenile or sexually mature adult stage, fish larvae undergo major  
83 anatomical, physiological, behavioural and quite often, ecological changes (Evans & Browman  
84 2004, Carleton et al. 2020). This developmental shift in habitat preference is often suggested  
85 to drive ontogenetic changes in opsin expression (e.g. cichlids: Carleton et al. 2016; black  
86 bream: Shand et al., 2002; eel: Cottrill et al. 2009; damselfishes: Stieb et al. 2016, bluefin  
87 killifish: Chang et al. 2021; gambusia: Chang et al. 2020; rainbow trout: Allison et al. 2006;  
88 dottybacks: Cortesi et al. 2016; deep-sea fishes: Lupše et al. 2021). However, changes of photic  
89 conditions solely do not always result in different and stage-specific visual system  
90 modifications, as seen in the Atlantic cod (Valen et al. 2016) or the spotted unicornfish  
91 (Tettamanti et al. 2019). This suggests other factors, such as behaviour, developmental or  
92 phylogenetic constraints also play a role in shaping the visual diversity of fishes and potential  
93 age-related shifts of it.

94           Here we aim to investigate ontogenetic changes of the opsin and phototransduction  
95 cascade gene expression across ray-finned fishes, to estimate presence and relative abundance  
96 of opsin gene classes, and to elucidate general and/or taxon-specific patterns. For the purpose  
97 of this study we have sequenced and analysed 1) retinal transcriptomes of different  
98 developmental stages of 14 species, belonging to five major actinopterygian orders: *Polypterus*  
99 *senegalensis* (Polypteriformes), *Acipenser ruthenus* (Acipenseriformes), *Abramis brama* and  
100 *Vimba vimba* (both Cypriniformes), *Scopelarchus* spp. and *Coccorella atlantica* (both  
101 Aulopiformes), *Coptodon bembini*, *C. imbriferus*, *C. flava*, *C. snyderae*, *C. thysi*, *Sarotherodon*

102 *linnellii*, *S. lohbergeri* and *Stomatepia pindu* (all Cichliformes from the Bermin and Barombi  
103 Mbo lakes). 2) We have complemented this data set by publicly available  
104 embryonic/larval/juvenile/adult transcriptomes belonging to 49 species and 21 orders, some of  
105 which have never been analysed for visual gene expression before. In total, the comprehensive  
106 data set of 63 species from 23 ray-finned fish orders allows us to focus on development of the  
107 opsin gene expression, and rod and cone cell identity throughout actinopterygian evolution.

108

## 109 **RESULTS AND DISCUSSION**

110 **General developmental patterns of opsin gene expression across the actinopterygian**  
111 **phylogeny – cone-to-rod developmental constraint.** The analysis of the opsin gene  
112 expression in 63 ray-finned fishes revealed that generally, the ratio of the rod opsin (*RH1* or  
113 Rho,  $\lambda_{\max}$ : 447–525 nm) to cone opsin expression increases with age in analysed species (Figs  
114 1 and 2, Supp Table). This is in accord with the cone-to-rod development of the retina which  
115 starts with cone cells, and rods appearing only later (Sernagor et al. 2006, Valen et al. 2016,  
116 Lupše et al. 2021). The increasing rod:cone cell ratio is further confirmed by the expression of  
117 the phototransduction cascade gene *GNAT1* (rod specific) vs. *GNAT2* (cone specific), Fig. 3b.  
118 Rod opsin and *GNAT1/2* usage increases significantly already during the larval and juvenile  
119 stage, before finally transforming retinae of sexually mature adults into predominantly rod-  
120 over-cone-expressing tissues (Figs 1 and 2, Supp Table). It thus seems that larval vision is  
121 mostly driven by cone vision, while the ability to perform well in low-light conditions appears  
122 consequently, at later developmental stages (Evans and Browman 2004, Evans and Fernald  
123 1990). Functionally, rods generally allow for an improvement in visual acuity and startle  
124 responses in fishes (Fuiman 1993, Pankhurst et al. 1993, Fuiman and Delbos 1998) and are  
125 also associated with motion sensitivity and the appearance of novel behaviours, such as  
126 schooling (Hunter & Coyne 1982). More specifically, higher rod expression increases  
127 individual performance of fishes living in the deep-sea (de Busserolles et al. 2020, Lupše et al.  
128 2021). Additionally, laboratory experiments have shown that the ability to follow a rotating  
129 stripe pattern (the optomotor drum) might be dependent on rod formation and retinal  
130 development, as it is not seen in stages or specimens lacking rods (Blaxter 1986, Carvalho et  
131 al. 2002, Magnuson et al. 2020).

132 In the selected taxa (Fig. 3), we have specifically focused on the rod vs. cone identity  
133 by quantifying the expression of the phototransduction cascade gene *GNAT1* or *GNAT2*,  
134 respectively. We found correspondence between the expression of phototransduction cascade  
135 gene type and the opsin type (i.e. cone *SWS1*, *SWS2*, *RH2*, *LWS* and rod *RH1*), and detected a

136 clear increase of *GNAT1:GNAT2* ratio with ageing, with the exception of the Aulopiformes  
137 deep-sea fishes. In this group, a rare discordance between the dominating opsin type (rod-  
138 specific) and phototransduction cascade genes (cone-specific) in adults suggests a presence of  
139 possibly transmuted photoreceptors, and an overall intriguing visual system which needs to be  
140 investigated further (Fig 3, Lupše et al. 2021).

141

142 **Developmental switch of the short-wavelength sensitive opsin genes.** A trend of age-related  
143 shifts in expression also appears within cone opsins. Our data set shows a clear decrease in  
144 proportional expression of the ultraviolet or UV-sensitive *SWS1* ( $\lambda_{\max}$ : 347–383 nm) with age.  
145 Although *SWS1* expression usually remains in the lower quarter of the total cone opsin  
146 expression, it seems to be expressed in early stages throughout the phylogeny (Fig 1, Supp  
147 Table). On one hand, UV radiation can result in larval mortality; to mitigate negative effects  
148 of exposure, UV avoidance through detection of ultraviolet light and adjustments of vertical  
149 position is expected (Ylönen et al. 2004, Guggiana-Nilo and Engert 2016). On the other hand,  
150 distinguishing wavelengths belonging to the UV part of the visual spectrum aids younger  
151 individuals that feed on zooplankton (Browman et al. 1994, Flamarique et al. 2013, Fattah  
152 Ibrahim et al. 2015). With ageing and a shift in diet, UV opsin expression probably becomes  
153 irrelevant (Britt et al. 2001), thus potentially explaining why adults never (e.g. *Naso*  
154 *brevirostris*, *Oryzias latipes*) or rarely (e.g. *Danio rerio*, *Poecilia reticulata*, cichlids) express  
155 *SWS1* cone opsin (Fig 1, Supp Table). Adult expression of *SWS1*, when seen, seems to play a  
156 role in species and/or colour discrimination and mate selection (guppies: Smith et al. 2002;  
157 damselfishes: Siebeck et al. 2010; cichlids: Carleton et al. 2016), male aggression  
158 (sticklebacks: Rick and Bakker 2008) or is associated with migration events (salmonids:  
159 Allison et al., 2006). The blue sensitive *SWS2* cone opsin ( $\lambda_{\max}$ : 397–482 nm), shows a more  
160 complex pattern (Figs 1 and 2, Supp Table). Interestingly, while some fish (e.g. sturgeons or  
161 cyprinids) seem to ontogenetically decrease the proportion of both *SWS1* and *SWS2* opsins, in  
162 other fish groups (e.g. cichlids) we observe a replacement of one type by another (Fig 3). This  
163 switch in single cone opsin expression between *SWS1* and *SWS2* has been shown before e.g.  
164 by Spady et al. (2006) in Nile tilapia or by Cheng and Flamarique (2007) in rainbow trout, and  
165 it keeps the total single cone opsin expression similar between different developmental stages  
166 (Fig. 2).

167

168 **Middle and long-wavelength sensitive opsins in double cones:** The ontogenetic switch in  
169 expression occurs also between the green-sensitive *RH2* ( $\lambda_{\max}$ : 452–537 nm) and the red-

170 sensitive *LWS* ( $\lambda_{\max}$ : 501–573 nm) cone opsin types; plus switching between different *RH2*  
171 copies also commonly occurs (Fig 3). Values for these typically double-cone opsins vary  
172 considerably across the fish phylogeny, but a general trend of a decrease in relative expression  
173 of *RH2*, and an increase of *LWS* with age is detected (Figs 1 and 2, Supp Table), except for  
174 groups that completely lost the *LWS* opsin gene. In general, medium-wavelength opsins appear  
175 to be of use to all stages (Figs 1 and 2, Supp Table), perhaps due to general presence of  
176 corresponding wavelengths in most habitats. Our overview data seem to show the trend of  
177 freshwater species exhibiting the dominance of red-sensitive *LWS* opsin gene expression,  
178 whereas in marine species, green-sensitive *RH2* gets to be more dominant (with exceptions)  
179 (Fig 1). Namely, for species inhabiting the spectrally narrower deep sea at least during certain  
180 parts of their lives (Stomiiformes, Aulopiformes, Trachichthyiformes, Anguilliformes,  
181 Gadiformes), *RH2* seems to be the most important, if not the only cone opsin expressed (Fig 1,  
182 Lupše et al. 2021). On the other hand, expression of *LWS* in adults might be a response to  
183 inhabiting freshwater habitats, such as turbid rivers and murky, eutrophic lakes (e.g. Lake  
184 Victoria where usually, longer wavelengths penetrate to greater depths and are the most  
185 prevalent colour of the ambient light (Hofmann et al. 2009, Carleton et al. 2016). Expression  
186 of *LWS* could also be beneficial for foraging in herbivorous reef fishes, providing them with  
187 the visual ability to discriminate benthic algae from coral reef backgrounds (Marshall et al.  
188 2003, Stieb et al. 2017). In some cases, increased *LWS* expression and expanded *LWS*  
189 repertoires might also be explained by sexual selection (e.g. in Poeciliidae), where females  
190 evolved mate preferences for red and orange male coloration (Watson et al. 2011).

191

192 **Age-specific cone opsin gene copies in the selected taxa.** We have specifically focused and  
193 de-novo sequenced retina transcriptomes of larvae/juveniles and adults of 14 actinopterygian  
194 species belonging to five orders spanning the ray-finned fish phylogeny. Apart from the  
195 aforementioned rod vs. cone identity assessed by *GNAT* genes, we have additionally focused  
196 on switches between copies of the same opsin type in the selected taxa (Fig 3, Supp Table).  
197 Namely, we studied the visual opsin gene repertoire in two basal non-teleost fish groups,  
198 bichirs (Polypteriformes) and sturgeons (Acipenseriformes), and in teleost riverine cyprinids  
199 (Cypriniformes, Ostariophysi), crater-lake cichlids (Cichliformes, Euteleostei) and deep-sea  
200 pearleyes and sabretooths (Aulopiformes, Euteleostei). The overall expression patterns are in  
201 most cases in accord with the general patterns discussed above (Figure 3, Supp Table), with  
202 exceptions seen in the deep-sea fishes (based on our earlier data from Lupše et al. 2021).

203 In all species but the bichir, we found multiple copies within at least one opsin gene  
204 type, namely within the rod *RH1* opsin, and cone *SWS2* and *RH2* opsins. In some species  
205 (cyprinids, sturgeon, *Scopelarchus* spp.) we found simultaneous expression of two rod *RH1*  
206 copies (Fig 1, Supp Table). All three groups possess the two *RH1* genes in their genome  
207 resulting from three independent ancestral gene duplication events (Musilova et al. 2021, Lupše  
208 et al. 2021). The *RH1* gene duplicates were lost in the later evolution of the euteleost crown  
209 group, and hence most teleost species carry only one *RH1* copy, a phenomenon similar to that  
210 seen in “non-fish” vertebrates. *RH1* copies do not show any sign of ontogenetic switch in  
211 studied species, as is the case for e.g. eels (Hope et al., 1998). On the other hand, we detected  
212 several cases of stage-specific copies within cone opsin genes. While *Acipenser ruthenus* and  
213 *Abramis brama* + *Vimba vimba* express only one *SWS2* copy, cichlids express two different  
214 *SWS2* genes (Fig 3, Supp Table); this corresponds to multiple copies found in their genome  
215 due to the neoteleost- and percomorph-specific *SWS2* gene duplications (Cortesi et al. 2015).  
216 Most examined species show an expanded *RH2* repertoire (Fig 3, Supp Table) and the existence  
217 of clearly larval and adult-specific copies has been observed in cyprinids, cichlids and in the  
218 deep-sea aulopiforms (Fig. 3). Expression of multiple copies might enhance colour vision by  
219 increased spectral resolution useful in a particular environment, however reasons for these  
220 opsin switches are not yet completely understood. The presence of such stage-specific copies  
221 means that species adjust their vision to differing light environments not only through a change  
222 in opsin class expression, but also through preferential expression of opsin copies within a  
223 single class. In cichlids, a group for which the development of visual system is probably best  
224 understood, a shift to longer-wavelength copies is generally observed within a single opsin type  
225 (*RH2A* copies replacing *RH2B* with age) or among single-cone opsins (*SWS2* replacing *SWS1*)  
226 and has been reported before for different groups of cichlids (e.g., Malawi, Carleton et al. 2008;  
227 Nile tilapia, Spady et al., 2006).

228 Mesopelagic deep-sea aulopiform species have a limited repertoire of cone opsin  
229 classes that reflects living in photon-depleted depths (Musilova et al. 2019, Lupše et al. 2021).  
230 *Scopelarchus* spp. and *Coccorella atlantica* express only one cone opsin class, namely *RH2*  
231 (Fig 3, Supp Table). However, both expanded their *RH2* repertoires and express larval- and  
232 adult-specific copies that are thought to be functionally different and most likely best respond  
233 to different wavelengths shallow-water epipelagic larvae and mesopelagic deep-water adults  
234 encounter (Fig 3, Supp Table) (Lupše et al. 2021). Genomic analyses by Lupše et al. (2021)  
235 reveal a total of three, and seven *RH2* cone opsin copies within the genomes of *Coccorella*  
236 *atlantica* and *Scopelarchus michaelsarsi*, respectively. Mesopelagic fish lineages in some cases

237 expand rod opsin repertoires, which are better suited for dim-light conditions (Musilova et al.  
238 2019, Lupše et al. 2021). *Coccorella* and *Scopelarchus*, however, seem to inhabit relatively  
239 shallower and photon-richer depths than some other deep-sea fishes, such as Stomiiformes, and  
240 might thus benefit also from having extra copies of cone opsins (Lupše et al. 2021).

241 We have collected a robust data set combining not only our own, but also publicly  
242 available genetic data, deposited in databases. This allowed us to detect shared vs. specific  
243 expression patterns among different fish groups. We are aware that the collected data set has  
244 certain limitations, and many factors could not be controlled in this study. We also do not  
245 present any developmental time series but rather snapshots of embryos, larvae, juveniles and  
246 adults. As not all stages are available for all species, more subtle or time-restricted expression  
247 patterns could not be detected here. Despite this, our combined data provides robust evidence  
248 for expression patterns shared across distantly related fish groups, as it highlights general  
249 trends, and more detailed conclusions achieved through in-detail analyses of species  
250 specifically sequenced within this study.

251

## 252 **Conclusions**

253 To conclude, this study aims to identify general patterns of the visual opsin gene expression  
254 shared among ray-finned fishes, and to detect similarities in the ontogenetic changes between  
255 opsin gene types. We found that the rod:cone opsins ratio increased with age in fish species,  
256 supporting the conserved cone-to-rod developmental pathway. We also noted the increased  
257 importance of the long-wavelength sensitive *LWS* opsin genes, and the decreased importance  
258 of the short-wavelength sensitive *SWS1* opsin gene, observed across ray-finned fish phylogeny  
259 (e.g. in sturgeons, cyprinids and cichlids). We have further detected the existence of different  
260 stage-specific *RH2* copies, which are switched during development. To conclude, fish visual  
261 systems are evolutionary and developmentally very dynamic and future studies focused on  
262 particular fish groups promise to throw further light on exact mechanisms, patterns and reasons  
263 for this extreme sensory system diversity.



## 264 METHODS AND MATERIALS

265 **Data and sample collection** Transcriptomes belonging to taxa deemed as focal groups, which  
266 were inspected for age-specific copies and presented in detail in Figure 3, were obtained from  
267 specimens (N=72) caught solely for the purpose of this study. In detail, 16 specimens were  
268 classified as larvae, 4 as juveniles, 3 as subadults and 49 as adults (Figure 3, Supp Table).  
269 *Polypterus senegalensis* larvae were collected in the rearing facility of the Department of  
270 Zoology, Charles University, and the adults were purchased from the aquarium trade.  
271 *Acipenser ruthenus* and *Abramis brama* were collected at the rearing facility in Vodňany, and  
272 in local water bodies (adults: Velky Tisy pond, Klicava dam, Lipno dam; larvae: Vltava and  
273 Elbe rivers), Czech Republic, respectively. Both mesopelagic taxa, *Scopelarchus* spp. and  
274 *Coccorella atlantica*, were collected in the Sargasso Sea and originate from Lupše et al. (2021).  
275 Crater lake cichlids were collected in lakes Barombi Mbo and Bermin (Cameroon, West  
276 Africa) between 2013 and 2018 (research permit numbers:  
277 0000047,49/MINRESI/B00/C00/C10/nye, 0000116,117/MINRESI/ B00/C00/C10/C14,  
278 000002-3/MINRESI/B00/C00/C10/C11, 0000032,48-50/MINRESI/B00/C00/C10/C12).  
279 Larvae were caught by fine-meshed nets and fixed in RNAlater™ immediately. Adults were  
280 collected using gill nets and selective capturing by snorkelling in the shallow-water zone. For  
281 all species, fin clips were taken from specimens and stored in 96% EtOH for sub-sequent  
282 molecular analyses. Larval samples were fixed in RNAlater™ (ThermoFisher) and stored at  
283 -80 °C until further use. Adults of all species were euthanised on site with eyes or retinae  
284 extracted, fixed in RNAlater™ and stored at -80 °C upon arrival to the laboratory.

285 To obtain publicly available transcriptomes used in this study (Fig 1, Supp Table), we  
286 searched the largest publicly available repository of high throughput sequencing data, the  
287 Sequence Read Archive (SRA), using the following topic search term: ‘(embryo\* OR larva\*  
288 OR juvenile\* OR adult\*) AND (retina\* OR eye\* OR head\* OR whole\*) AND (taxon name \*  
289 OR fish\*)’. Whenever possible, we have analysed up to three specimens per stage per species  
290 (Fig 1, Supp Table). In case of embryos, specimens closest to hatching were analysed (for  
291 reasons, see Results and Discussion). The entire dataset analysed, including de-novo  
292 transcriptomes described below, includes 215 samples of which, based on morphology, 56 were  
293 classified as embryos, 40 as larvae, 25 as juveniles, 3 as subadults and 91 as adults (Figs 1 and  
294 3, Supp Table). Sample IDs, number of raw reads, individual accession numbers for BioProject  
295 XX and further parameters are listed in the Supplementary Table.

296 **Transcriptome sequencing and analyses** Total RNA was extracted from the whole eyes or  
297 retinal tissue using either the RNeasy micro or mini kit (Qiagen). The extracted RNA  
298 concentration and integrity were verified on a 2100 Bioanalyzer (Agilent) and Qubit  
299 Fluorometer (ThermoFisher Scientific). RNAseq libraries were constructed in-house from  
300 unfragmented total RNA using Illumina's NEBNext Ultra II Directional RNA library  
301 preparation kit, NEBNext Multiplex Oligos and the NEBNext Poly(A) mRNA Magnetic  
302 Isolation Module (New England Biolabs). Multiplexed libraries were sequenced on the  
303 Illumina HiSeq 2500 platform as 150 bp paired-end (PE) reads. The sequence data was quality-  
304 checked using FastQC (Andrews 2017). Opsin gene expression was then quantified using  
305 Geneious software version 11.0.3 (Kearse et al. 2012). In case of each sample, we mapped the  
306 reads against a genomic reference dataset for all opsin genes, obtained from the NCBI,  
307 belonging to the exact or a closely related species, using the Medium-sensitivity settings in  
308 Geneious. This enabled us to identify cone and rod opsin specific reads. If needed, paralogous  
309 genes were subsequently disentangled following the methods in Musilova et al. 2019a and de  
310 Busserolles et al. 2017. Created species-specific opsin references were re-mapped to the  
311 transcriptome reads with Medium-Low sensitivity to obtain copy-specific expression levels.  
312 We report opsin gene proportional expression in relation to the total opsin gene expression, and  
313 to the total cone opsin gene expression (Supp Table). The abovementioned quantification of  
314 opsin gene expression was also used on transcriptomes obtained from SRA. Identical pipeline  
315 was used for quantification of *GNATI/2* genes in selected taxa (Fig 3).

316

### 317 **Acknowledgements**

318 We would like to express our deep gratitude to Adrian Indermaur and Petra Horká for their  
319 help with the field sampling. We thank local people of the Barombi and Bemé village to allow  
320 us to fish in the Barombi Mbo and Bermin lakes, and the Ministry of Scientific Research and  
321 Innovation in Cameroon to grant us research permits. NL and ZM were supported by the Swiss  
322 National Science Foundation (PROMYS – 166550), ZM by the PRIMUS Research Programme  
323 (Charles University), the Czech Science Foundation (21-31712S) and the Basler Stiftung fuer  
324 Experimentelle Zoologie. VT and PK were supported by GAUK (1767618). VK was funded  
325 by Ministry of Education, Youth and Sports of the Czech Republic – the project Reproductive  
326 and Genetic Procedures for Preserving Fish Biodiversity and Aquaculture  
327 (CZ.02.1.01/0.0/0.0/16\_025/0007370).

328

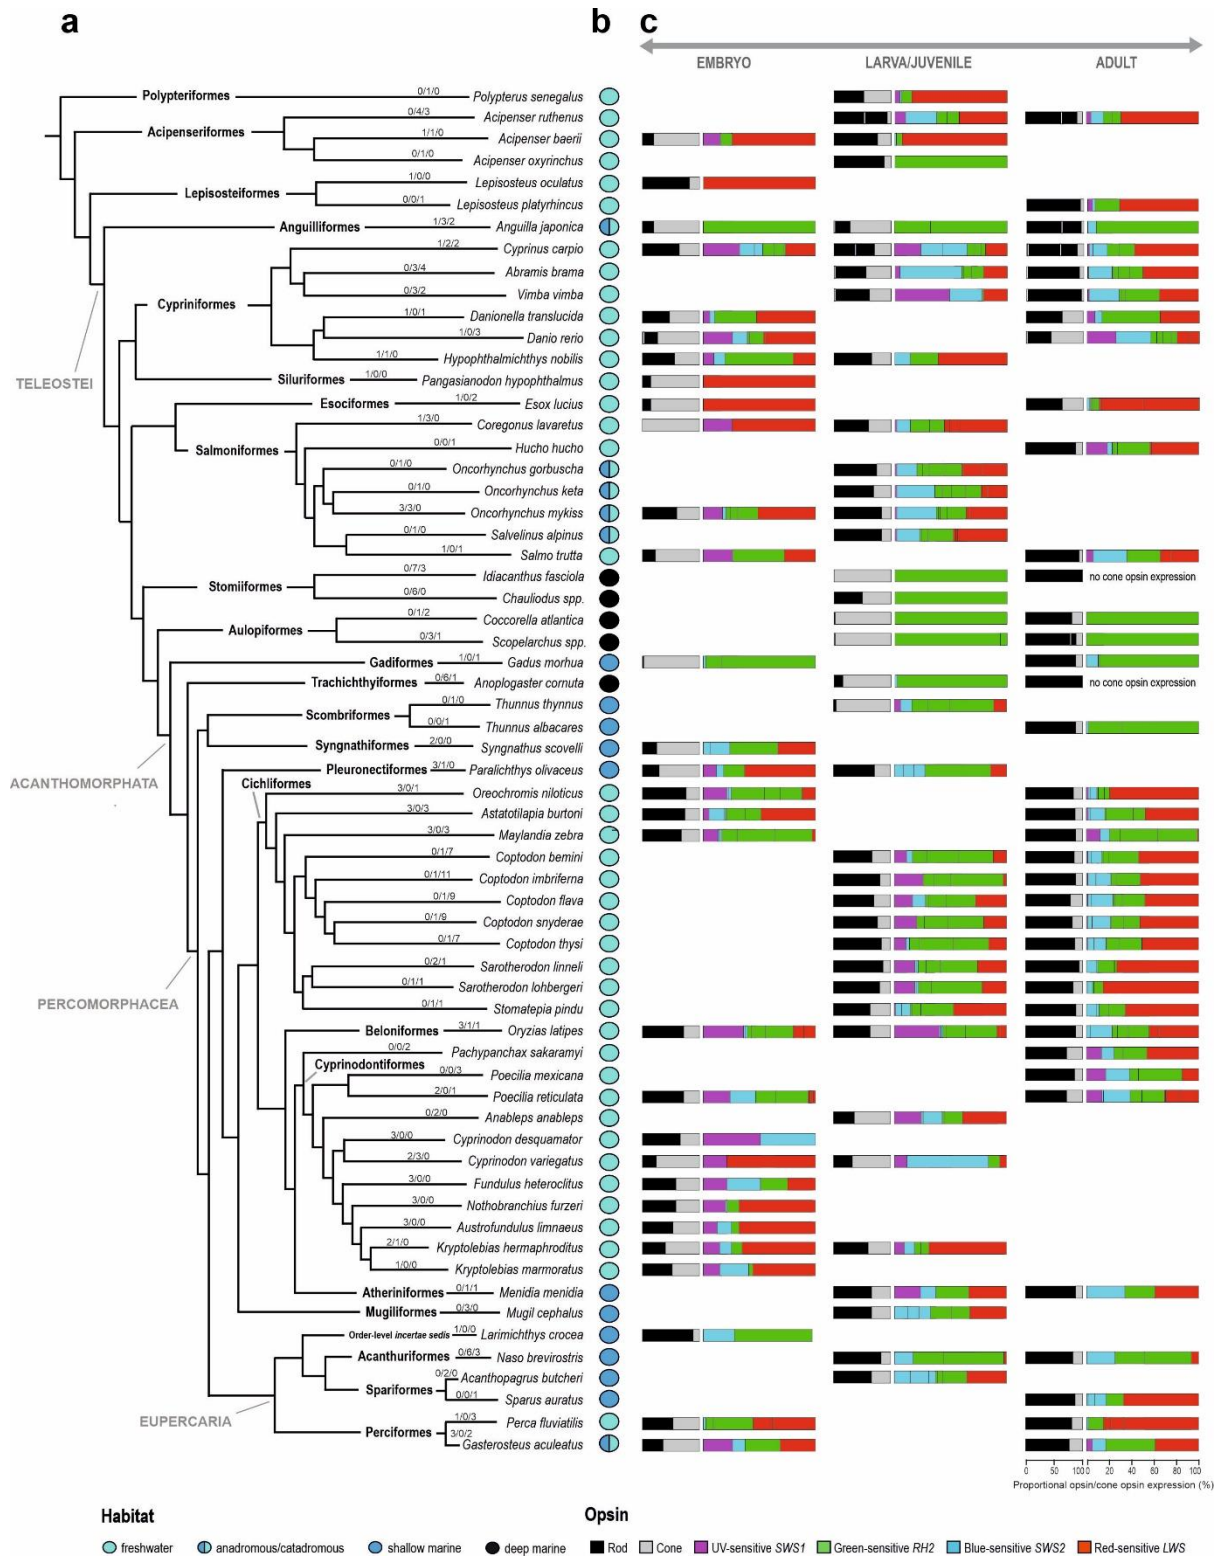

329

330 **Fig. 1: Opsin gene expression in different developmental stages of ray-finned fishes (Actinopterygii).** (A)  
 331 Simplified phylogeny of the 63 species, belonging to twenty-three orders, for which the transcriptomes were  
 332 analysed (topology after Betancur et al. 2017). Numbers above branches represent number of individuals per  
 333 developmental stage analysed (embryo/larva+juvenile/adult). (B) Information on habitat preference, obtained  
 334 from <https://www.fishbase.de>. Separation between the shallow and deep marine species is 200m. Information on

335 depth obtained from <https://obis.org/>. (C) Proportional opsin gene expression (horizontal bars) at different  
 336 developmental stages. First (shorter) bar represents mean proportional expression of rod and cone opsins. Cone  
 337 opsin expression (grey) is depicted as the sum of the expression of all four classes of cone opsin genes (SWS1,  
 338 SWS2, RH2, and LWS). If several rod opsin genes (black) were expressed, the different proportions of their  
 339 expression are distinguished with white vertical bars. Second (longer) bar represents mean proportional  
 340 expression of different cone opsins. Black vertical bars within gene classes separate different copies, if co-  
 341 expressed. For details, see Supplementary Table.  
 342  
 343

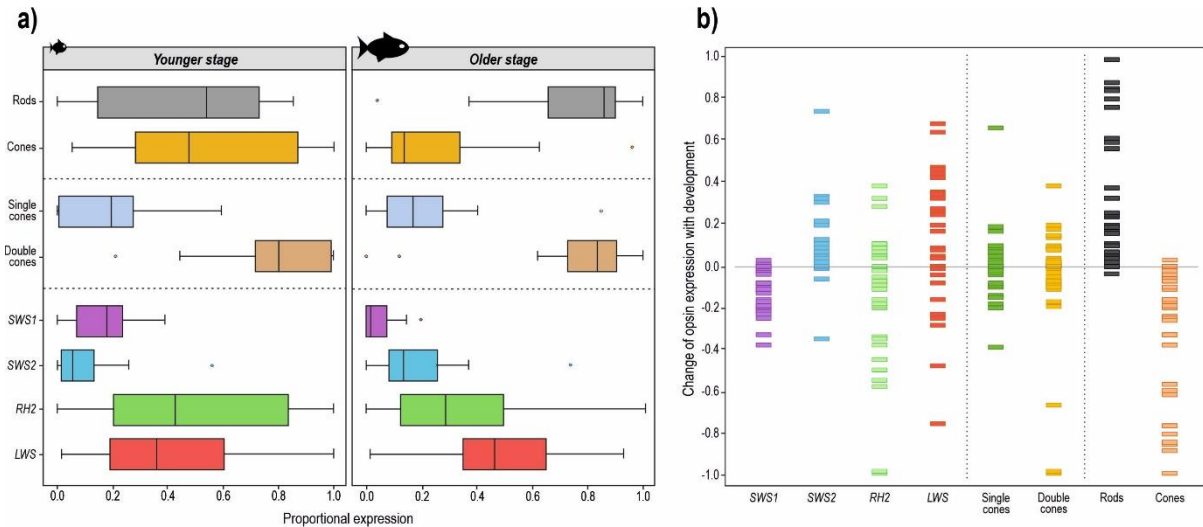

344  
 345 **Fig. 2: General patterns of age-related opsin expression changes.** (A) Interquartile ranges (25<sup>th</sup> and 75<sup>th</sup>  
 346 percentiles) and whiskers show data dispersion (relative expression) across different opsins for the youngest and  
 347 oldest analysed stage. Data medians are presented as solid vertical lines. To avoid over-representation of certain  
 348 taxa (e.g. five *Coptodon* species), data points represent mean genus values, comprised only of species that had at  
 349 least two developmental stages analysed (N=31). (B) Change of opsin expression (positive/negative) with  
 350 development, calculated as a difference between the mean opsin expression in the oldest and the youngest stage  
 351 of a certain genus. Resulting values are represented by rectangles (N=31), centred at the mean. Lower half of the  
 352 plot (values below 0.0) shows a decrease, and the upper half (values above 0.0) an increase in relative expression  
 353 with age.

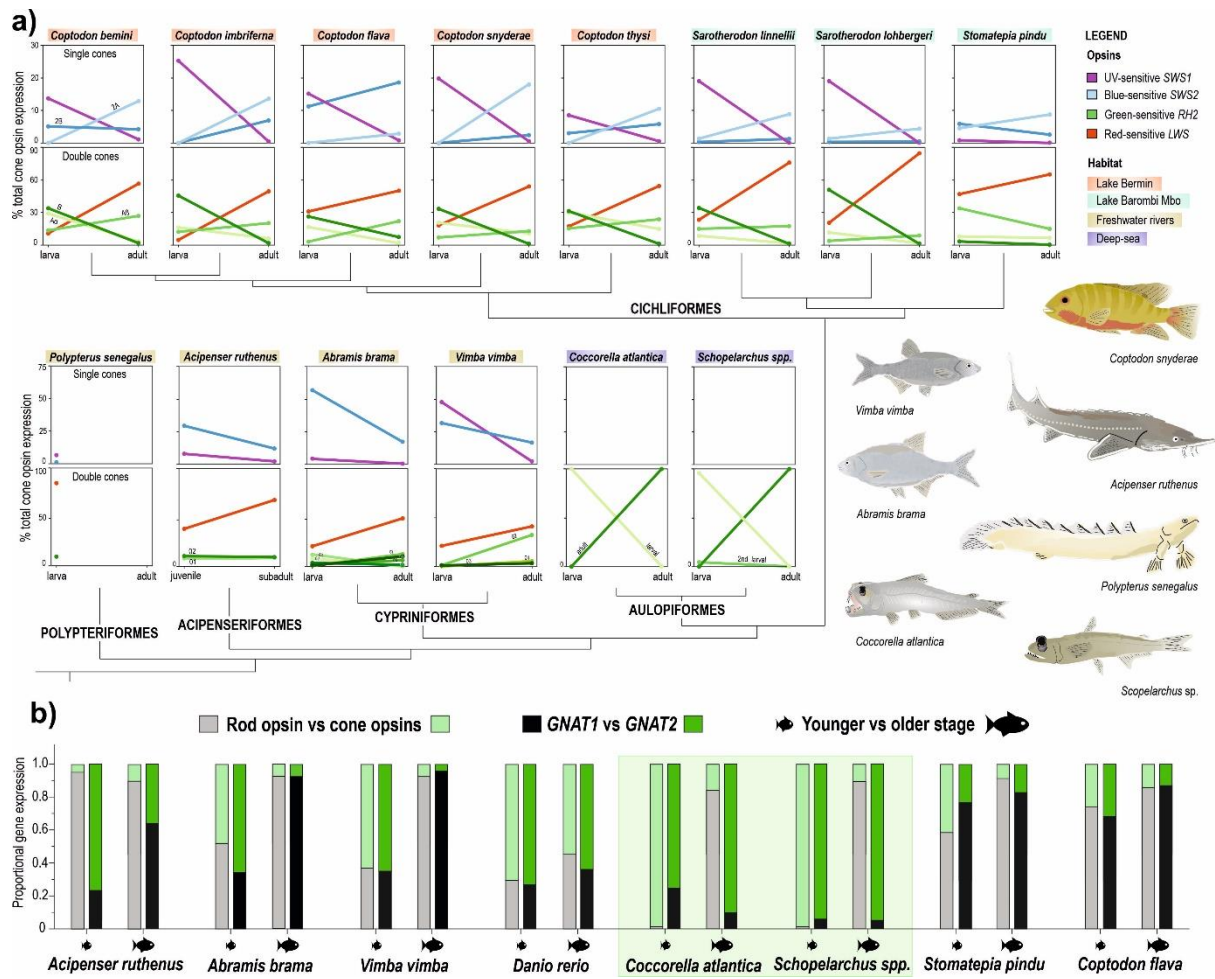

354

355 **Fig. 3: Cone opsin switches, age-specific copies and phototransduction cascade gene expression of**  
 356 **representative taxa specifically sequenced for this study. (A) Detailed presentation of ontogenetic changes of**  
 357 **opsin expression in selected polypteriform, acipenseriform, cypriniform, aulopiform and cichliform species-**  
 358 **Interconnected dots are coloured according to specific single and double cone opsins and present mean**  
 359 **expression values for specific developmental stages. In cases of gene duplications, copies are named and coloured**  
 360 **with different shades. For details on number of individuals and exact values, see Supplementary Table. (B)**  
 361 **Ontogenetic changes of rod/cone opsin gene expression, and to it related shifts in expression of phototransduction**  
 362 **cascade genes GNAT1 (rod-specific) and GNAT2 (cone-specific) for selected teleost taxa. Highlighted in green**  
 363 **are special cases of the two aulopiform species that exhibit a discordance between the dominating opsin type**  
 364 **(rod-specific) and phototransduction cascade genes (cone-specific) in adults (Lupše et al. 2021).**

365 **References:**

- 366 **Allison WT, Dann SG, Veldhoen KM, Hawryshyn CW.** 2006 Degeneration and  
367 regeneration of ultraviolet cone photoreceptors during development in rainbow trout. *Journal*  
368 *of Comparative Neurology*, 499(5), 702-715.
- 369 **Andrews S.** 2017. FastQC: a quality control tool for high throughput sequence data. 2010.
- 370 **Betancur-R R. et al.** 2017 Phylogenetic classification of bony fishes. *BMC evolutionary*  
371 *biology*, 17(1), 162
- 372 **Blaxter JHS.** 1986 Development of sense organs and behaviour of teleost larvae with special  
373 reference to feeding and predator avoidance. *Transactions of the American Fisheries Society*,  
374 115,98–114
- 375 **Browman HI, Flamarique IN, Hawryshyn CW.** 1994 Ultraviolet photoreception contributes  
376 to prey search behavior in two species of zooplanktivorous fishes. *J. Exp. Biol.* 186: 187–198.
- 377 **Carleton KL, Dalton BE, Escobar-Camacho D, Nandamuri SP.** 2016 Proximate and  
378 ultimate causes of variable visual sensitivities: insights from cichlid fish radiations. *Genesis*,  
379 54(6), 299-325.
- 380 **Carleton KL, Escobar-Camacho D, Stieb SM, Cortesi F, Marshall NJ.** 2020. Seeing the  
381 rainbow: mechanisms underlying spectral sensitivity in teleost fishes. *Journal of Experimental*  
382 *Biology*, 223(8).
- 383 **Carleton KL, Kocher TD.** 2001 Cone opsin genes of African cichlid fishes: tuning spectral  
384 sensitivity by differential gene expression. *Molecular Biology and Evolution*, 18(8), 1540-  
385 1550.
- 386 **Carleton KL, Spady TC, Streelman JT, Kidd MR, McFarland WN, Loew ER.** 2008 Visual  
387 sensitivities tuned by heterochronic shifts in opsin gene expression. *BMC Biology*, 6(1), 1-14.
- 388 **Carvalho PS, Noltie DB, Tillitt DE.** 2002 Ontogenetic improvement of visual function in the  
389 medaka *Oryzias latipes* based on an optomotor testing system for larval and adult fish. *Animal*  
390 *Behaviour*, 64(1), 1-10.
- 391 **Chang CH, Catchen J, Moran RL, Rivera-Colón AG, Wang YC, Fuller RC.** 2021  
392 Sequence analysis and ontogenetic expression patterns of cone opsin genes in the bluefin  
393 killifish (*Lucania goodei*). *Journal of Heredity*. 112(4), 357-366.
- 394 **Chang CH, Wang YC, Shao YT, Liu SH.** 2020 Phylogenetic analysis and ontogenetic  
395 changes in the cone opsins of the western mosquitofish (*Gambusia affinis*). *PloS one*, 15(10),  
396 e0240313.
- 397 **Cheng CL, Flamarique IN.** 2007 Chromatic organization of cone photoreceptors in the retina  
398 of rainbow trout: single cones irreversibly switch from UV (SWS1) to blue (SWS2) light

- 399 sensitive opsin during natural development. *Journal of Experimental Biology*. 210(23), 4123-  
400 4135
- 401 **Cortesi F, et al.** 2021. Multiple ancestral duplications of the red-sensitive opsin gene (LWS)  
402 in teleost fishes and convergent spectral shifts to green vision in gobies. *bioRxiv*:  
403 <https://doi.org/10.1101/2021.05.08.443214>.
- 404 **Cortesi, F, Camacho DE, Luehrmann M, Sommer GM, Musilova Z.** 2021 Multiple  
405 ancestral duplications of the red-sensitive opsin gene (*LWS*) in teleost fishes and convergent  
406 spectral shifts to green vision in gobies. *bioRxiv*.
- 407 **Cortesi F et al.** 2016 From crypsis to mimicry: changes in colour and the configuration of the  
408 visual system during ontogenetic habitat transitions in a coral reef fish. *Journal of Experimental*  
409 *Biology*, 219(16), 2545-2558.
- 410 **Cortesi F, et al.** 2015 Ancestral duplications and highly dynamic opsin gene evolution in  
411 percomorph fishes. *Proceedings of the National Academy of Sciences*, 112(5), 1493-1498.
- 412 **Cottrill PB, Davies WL, Bowmaker JK, Hunt DM, Jeffery G.** 2009 Developmental  
413 dynamics of cone photoreceptors in the eel. *BMC Developmental Biology*, 9(1), 1-9.
- 414 **de Busserolles F, et al.** 2017 Pushing the limits of photoreception in twilight conditions: The  
415 rod-like cone retina of the deep-sea pearlsides. *Science advances*, 3(11), eaao4709.
- 416 **Evans BI, Browman HI** 2004 Variation in the development of the fish retina. In American  
417 Fisheries Society Symposium (Vol. 40, pp. 145-166).
- 418 **Evans BI, Fernald RD.** 1990 Metamorphosis and fish vision. *Journal of neurobiology*, 21(7),  
419 1037-1052.
- 420 **Fattah Ibrahim A, Castilho Noll MSM, Valenti WC.** 2015. Zooplankton capturing by Nile  
421 Tilapia, *Oreochromis niloticus* (Teleostei: Cichlidae) throughout post-larval development.  
422 *Zoologia* (Curitiba) 32:469–475.
- 423 **Fernald RD.** 1985 Growth of the teleost eye: novel solutions to complex constraints.  
424 *Environmental Biology of Fishes*, 13(2), 113-123.
- 425 **Flamarique IN.** 2013 Opsin switch reveals function of the ultraviolet cone in fish foraging.  
426 *Proceedings of the Royal Society B: Biological Sciences*, 280(1752), 20122490.
- 427 **Fuiman LA.** 1993 Development of predator evasion in Atlantic herring, *Clupea harengus* L.  
428 *Animal Behaviour*, 45(6), 1101-1116.
- 429 **Fuiman LA, Delbos BC.** 1998 Developmental changes in visual sensitivity of red drum,  
430 *Sciaenops ocellatus*. *Copeia*, 936-943.
- 431 **Guggiana-Nilo DA, Engert F.** 2016 Properties of the visible light phototaxis and UV  
432 avoidance behaviors in the larval zebrafish. *Frontiers in behavioral neuroscience*, 10, 160.

- 433 **Hagedorn M, Fernald RD.** 1992. Retinal growth and cell addition during embryogenesis in  
434 the teleost, *Haplochromis burtoni*. *Journal of Comparative Neurology*, 321(2), 193-208.
- 435 **Helvik JV, Drivenes Ø, Harboe T, Seo HC.** 2001 Topography of different photoreceptor cell  
436 types in the larval retina of Atlantic halibut (*Hippoglossus hippoglossus*). *Journal of*  
437 *Experimental Biology*, 204(14), 2553-2559.
- 438 **Hofmann CM, O'Quin KE, Marshall NJ, Cronin TW, Seehausen O, Carleton KL.** 2009.  
439 The eyes have it: regulatory and structural changes both underlie cichlid visual pigment  
440 diversity. *PLoS biology*, 7(12), e1000266.
- 441 **Hope A, Partridge J, Hayes P.** 1998. Rod opsin shifts in the European eel, *Anguilla anguilla*  
442 (L). *Proc. R. Soc. Lond B*, 265(January), 869–874.
- 443 **Hunt DM, Hankins MW, Collin SP, Marshall NJ.** 2014. Evolution of visual and non-visual  
444 pigments (Vol. 4). Boston, MA: Springer.
- 445 **Hunt DM, Fitzgibbon J, Slobodyanyuk SJ, Bowmaker JK, Dulai KS.** 1997 Molecular  
446 evolution of the cottoid fish endemic to Lake Baikal deduced from nuclear DNA evidence.  
447 *Molecular Phylogenetics and Evolution*, 8(3), 415-422.
- 448 **Hunter JR, Coyne KM.** 1982 The onset of schooling in northern anchovy larvae, *Engraulis*  
449 *mordax*. *CalCOFI Rep*, 23, 246-251.
- 450 **Kearse M, et al.** 2012. Geneious Basic: an integrated and extendable desktop software  
451 platform for the organization and analysis of sequence data. *Bioinformatics*, 28(12), 1647-  
452 1649.
- 453 **La Vail MM, Rapaport DH, Rakic P.** 1991. Cytogenesis in the monkey retina. *J. Comp.*  
454 *Neurol.* 309, 86-114. doi:10.1002/cne.903090107.
- 455 **Lamb TD.** 2013. Evolution of phototransduction, vertebrate photoreceptors and retina.  
456 *Progress in retinal and eye research*, 36, 52-119.
- 457 **Lupše N, et al.** 2021 Visual gene expression reveals a cone to rod developmental progression  
458 in deep-sea fishes. *Molecular Biology and Evolution* 38(12):5664-5677
- 459 **Magnuson JT, Stieglitz JD, Garza SA, Benetti DD, Grosell M, Roberts AP.** 2020  
460 Development of visual function in early life stage mahi-mahi (*Coryphaena hippurus*). *Marine*  
461 *and Freshwater Behaviour and Physiology*, 53(5-6), 203-214.
- 462 **Malinsky M, et al.** 2015 Genomic islands of speciation separate cichlid ecomorphs in an East  
463 African crater lake. *Science*. 350(6267), 1493–8. <http://doi.org/10.1126/science.aac9927>
- 464 **Manousaki et al.** 2013 Parsing parallel evolution: ecological divergence and differential gene  
465 expression in the adaptive radiations of thick-lipped Midas cichlid fishes from Nicaragua.  
466 *Molecular ecology*, 22(3), 650-669.



- 467 **Marshall NJ, Jennings K, McFarland WN, Loew ER, Losey GS.** 2003 Visual biology of  
468 Hawaiian coral reef fishes. III. Environmental light and an integrated approach to the ecology  
469 of reef fish vision. *Copeia*, 2003(3), 467-480.
- 470 **Mears AJ, et al.** 2001. *Nrl* is required for rod photoreceptor development. *Nature genetics*,  
471 29(4), 447-452.
- 472 **Musilova Z, et al.** 2019a. Vision using multiple distinct rod opsins in deep-sea fishes. *Science*,  
473 364(6440), 588-592.
- 474 **Musilova Z, Salzburger W, Cortesi F.** 2021. The visual opsin gene repertoires of teleost  
475 fishes: evolution, ecology, and function. *Annual review of cell and developmental biology*, 37,  
476 441-468.
- 477 **Musilova Z, Cortesi F.** 2021 Multiple ancestral and a plethora of recent gene duplications  
478 during the evolution of the green sensitive opsin genes (*RH2*) in teleost fishes. *bioRxiv*.
- 479 **Musilova, et al.** 2019 Evolution of the visual sensory system in cichlid fishes from crater lake  
480 Barombi Mbo in Cameroon. *Molecular Ecology* 5010–5031. <http://doi.org/10.1111/mec.15217>
- 481 **Pankhurst PM, Pankhurst NW, Montgomery JC.** 1993. Comparison of behavioural and  
482 morphological measures of visual acuity during ontogeny in a teleost fish, *Forsterygion*  
483 *varium*, Tripterygiidae (Forster, 1801). *Brain, Behavior and Evolution*, 42(3), 178-188.
- 484 **Pointer MA, Carvalho LS, Cowing JA, Bowmaker JK, Hunt DM.** 2007. The visual  
485 pigments of a deep-sea teleost, the pearl eye *Scopelarchus analis*. *Journal of Experimental*  
486 *Biology*, 210(16), 2829-2835.
- 487 **Raymond PA.** 1995. Development and morphological organization of photoreceptors.  
488 *Neurobiology and Clinical Aspects of the Outer Retina* (pp. 1-23). Springer, Dordrecht.
- 489 **Ricci V, Ronco F, Musilova Z, Salzburger W.** 2022. Molecular evolution and depth-related  
490 adaptations of rhodopsin in the adaptive radiation of cichlid fishes in Lake Tanganyika.  
491 *Molecular Ecology*
- 492 **Rick IP, Bakker TC.** 2008 Males do not see only red: UV wavelengths and male territorial  
493 aggression in the three-spined stickleback (*Gasterosteus aculeatus*). *Naturwissenschaften*,  
494 95(7), 631-638.
- 495 **Sernagor E, Eglen S, Harris B, Wong R.** 2006. Retinal development. Cambridge University  
496 Press.
- 497 **Shand J, Hart NS, Thomas N, Partridge JC.** 2002. Developmental changes in the cone visual  
498 pigments of black bream *Acanthopagrus butcheri*. *Journal of Experimental Biology*, 205(23),  
499 3661-3667.

- 500 **Shen YC, Raymond PA.** 2004. Zebrafish cone-rod (*crx*) homeobox gene promotes  
501 retinogenesis. *Developmental biology*, 269(1), 237-251.
- 502 **Siebeck UE, Parker AN, Sprenger D, Mäthger LM, Wallis G.** 2010 A species of reef fish  
503 that uses ultraviolet patterns for covert face recognition. *Current Biology*, 20(5), 407-410.
- 504 **Smith EJ, Partridge JC, Parsons KN, White EM, Cuthill IC, Bennett AT, Church SC.**  
505 2002 Ultraviolet vision and mate choice in the guppy (*Poecilia reticulata*). *Behavioral*  
506 *Ecology*, 13(1), 11-19.
- 507 **Stieb SM, Cortesi F, Sueess L, Carleton KL, Salzburger W, Marshall NJ.** 2017 Why UV  
508 vision and red vision are important for damselfish (Pomacentridae): structural and expression  
509 variation in opsin genes. *Molecular ecology*, 26(5), 1323-1342.
- 510 **Stieb SM, Carleton KL, Cortesi F, Marshall NJ, Salzburger W.** 2016 Depth-dependent  
511 plasticity in opsin gene expression varies between damselfish (Pomacentridae) species.  
512 *Molecular ecology*, 25(15), 3645-3661.
- 513 **Sugawara T, et al.** 2005 Parallelism of amino acid changes at the *RH1* affecting spectral  
514 sensitivity among deep-water cichlids from Lakes Tanganyika and Malawi. *Proceedings of the*  
515 *National Academy of Sciences*, 102(15), 5448-5453.
- 516 **Tettamanti V, de Busserolles F, Lecchini D, Marshall NJ, Cortesi F.** 2019 Visual system  
517 development of the spotted unicornfish, *Naso brevirostris* (Acanthuridae). *Journal of*  
518 *Experimental Biology*, 222(24).
- 519 **Valen R, et al.** 2016 The two-step development of a duplex retina involves distinct events of  
520 cone and rod neurogenesis and differentiation. *Developmental biology*, 416(2), 389-401.
- 521 **Valen R, Karlsen R, Helvik JV.** 2018 Environmental, population and life-stage plasticity in  
522 the visual system of Atlantic cod. *Journal of Experimental Biology*, 221(1), jeb165191.
- 523 **Watson CT, et al.** 2011. Gene duplication and divergence of long wavelength-sensitive opsin  
524 genes in the Guppy, *Poecilia reticulata*. *J Mol Evol.* 72(2):240–252.
- 525 **Ylönen O, Heikkilä J, Karjalainen J.** 2004 Metabolic depression in UV-B exposed larval  
526 coregonids. *Annales Zoologici Fennici* (pp. 577-585).
- 527 **Yokoyama S.** 2008 Evolution of dim-light and color vision pigments. *Annu. Rev. Genomics*  
528 *Hum. Genet.*, 9, 259-282.
- 529 **Yokoyama S, Jia H.** 2020 Origin and adaptation of green-sensitive (*RH2*) pigments in  
530 vertebrates. *FEBS Open Bio*, 10(5), 873-882.
